# Supplementary material for: Optimisation of telephone triage of callers with symptoms suggestive of acute cardiovascular disease in out-of-hours primary care: observational design of the Safety First study
Source: PubMed Central journal article supplement — BMJ Open. 2019 Jul 1;9(7):e027477. doi: 10.1136/bmjopen-2018-027477 (PMC6609078; doi:10.1136/bmjopen-2018-027477), 2019-07-01
Supplement: bmjopen-2018-027477.draft_revisions.pdf [file bmjopen-2018-027477.draft_revisions.pdf]

# BMJ Open

BMJ Open is committed to open peer review. As part of this commitment we make the peer review history of every article we publish publicly available.

When an article is published we post the peer reviewers' comments and the authors' responses online. We also post the versions of the paper that were used during peer review. These are the versions that the peer review comments apply to.

The versions of the paper that follow are the versions that were submitted during the peer review process. They are not the versions of record or the final published versions. They should not be cited or distributed as the published version of this manuscript.

BMJ Open is an open access journal and the full, final, typeset and author-corrected version of record of the manuscript is available on our site with no access controls, subscription charges or pay-per-view fees (<http://bmjopen.bmj.com>).

If you have any questions on BMJ Open's open peer review process please email [info.bmjopen@bmj.com](mailto:info.bmjopen@bmj.com)

# BMJ Open

## Optimisation of telephone triage of callers with symptoms suggestive of acute cardiovascular disease in out of hours primary care: Design of the Safety First study

|                               |                                                                                                                                                                                                                                                                                                                                                                                                                                                                                                                                                                                                                                                                                                                                                                                                                                                                                                      |
|-------------------------------|------------------------------------------------------------------------------------------------------------------------------------------------------------------------------------------------------------------------------------------------------------------------------------------------------------------------------------------------------------------------------------------------------------------------------------------------------------------------------------------------------------------------------------------------------------------------------------------------------------------------------------------------------------------------------------------------------------------------------------------------------------------------------------------------------------------------------------------------------------------------------------------------------|
| Journal:                      | <i>BMJ Open</i>                                                                                                                                                                                                                                                                                                                                                                                                                                                                                                                                                                                                                                                                                                                                                                                                                                                                                      |
| Manuscript ID                 | bmjopen-2018-027477                                                                                                                                                                                                                                                                                                                                                                                                                                                                                                                                                                                                                                                                                                                                                                                                                                                                                  |
| Article Type:                 | Protocol                                                                                                                                                                                                                                                                                                                                                                                                                                                                                                                                                                                                                                                                                                                                                                                                                                                                                             |
| Date Submitted by the Author: | 24-Oct-2018                                                                                                                                                                                                                                                                                                                                                                                                                                                                                                                                                                                                                                                                                                                                                                                                                                                                                          |
| Complete List of Authors:     | Erkelens, Daphne; University Medical Center Utrecht, Utrecht University, Julius Center for Health Sciences and Primary Care<br>Wouters, Loes; University Medical Center Utrecht, Utrecht University, Julius Center for Health Sciences and Primary Care<br>Zwart, D.L; University Medical Center Utrecht, Utrecht University, Julius Center for Health Sciences and Primary Care<br>Damoiseaux, Roger; University Medical Center Utrecht, Utrecht University, Julius Center for Health Sciences and Primary Care<br>De Groot, Esther; University Medical Center Utrecht, Utrecht University, Julius Center for Health Sciences and Primary Care<br>Hoes, Arno; University Medical Center Utrecht, Utrecht University, Julius Center for Health Sciences and Primary Care<br>Rutten, Frans; University Medical Center Utrecht, Utrecht University, Julius Center for Health Sciences and Primary Care |
| Keywords:                     | PRIMARY CARE, Myocardial infarction < CARDIOLOGY, Stroke < NEUROLOGY                                                                                                                                                                                                                                                                                                                                                                                                                                                                                                                                                                                                                                                                                                                                                                                                                                 |
|                               |                                                                                                                                                                                                                                                                                                                                                                                                                                                                                                                                                                                                                                                                                                                                                                                                                                                                                                      |

SCHOLARONE™  
Manuscripts

1  
2  
3 **Optimisation of telephone triage of callers with symptoms suggestive of acute cardiovascular**  
4 **disease in out of hours primary care: Design of the Safety First study**  
5  
6

7  
8 D.C. Erkelens<sup>1\*</sup>, L.T. Wouters<sup>1\*</sup>, D.L. Zwart<sup>1</sup>, R.A. Damoiseaux<sup>1</sup>, E. de Groot<sup>1</sup>, A.W. Hoes<sup>1</sup>, F.H.  
9 Rutten<sup>1</sup>  
10

11  
12  
13 \*Both authors contributed equally

14  
15 <sup>1</sup>Julius Centre for Health Sciences and Primary Care, Department of General Practice, University  
16 Medical Centre Utrecht, Utrecht University, Utrecht, The Netherlands.  
17  
18

19  
20  
21  
22 **Corresponding author:** D.C. Erkelens<sup>1</sup>, MD, PhD candidate, Julius Centre for Health Sciences and  
23 Primary Care, University Medical Centre Utrecht, Utrecht University. Address: STR 6.131, PO  
24 Box 85500, 3508 GA Utrecht, The Netherlands. Phone number: +31 (0)88 75 69289. Email:  
25 [D.C.A.Erkelens@umcutrecht.nl](mailto:D.C.A.Erkelens@umcutrecht.nl)  
26  
27  
28  
29  
30  
31

32  
33 The Netherlands National Trial Register identification number: NTR7331.  
34  
35  
36  
37  
38  
39  
40  
41  
42  
43  
44  
45  
46  
47  
48  
49  
50  
51  
52  
53  
54  
55  
56  
57  
58  
59  
60

## Abstract

**Introduction:** In the Netherlands, the “Netherlands Triage Standard” (NTS) is frequently used as digital decision support system for telephone triage at out-of-hours primary care services (OHS-PC). Aim of NTS is to guarantee accessible, efficient and safe care. However, there are indications that current triage is inefficient, with overestimation of urgency, notably in suspected acute cardiovascular disease. In addition, in primary care setting the NTS has only been validated against surrogate markers, and diagnostic accuracy with clinical outcomes as the reference is unknown. In the Safety First study, we address this gap in knowledge by describing, understanding and improving the diagnostic process and urgency allocation in callers with symptoms suggestive of acute cardiovascular disease, in order to improve both efficiency and safety of telephone triage in this domain.

**Methods and analysis:** A cross-sectional study in which 3,000 telephone triage recordings (period 2014-2016) will be analysed. Information is collected from the recordings including caller- and symptom characteristics and urgency allocation. The callers' own general practitioners are contacted for the final diagnosis of each contact. We included recordings of callers with symptoms suggestive of acute coronary syndrome (ACS) or transient ischemic attack (TIA)/stroke. With univariable and multivariable logistic regression analyses the diagnostic accuracy of caller- and symptom characteristics will be analysed in terms of predictive values with urgency level, and ACS and TIA/stroke as outcomes, respectively. To further improve our understanding of the triage process at OHS-PC, we will carry out sub-studies applying mixed-methods and qualitative analysis; (i) case-control study on calamities, (ii) conversation analysis study, and (iii) interview study with triage nurses.

**Ethics and dissemination:** The Medical Ethics Committee of the University Medical Centre Utrecht, the Netherlands endorsed this study (National Trial Register identification: NTR7331). Results will be disseminated by abstracts, at scientific conferences, regional educational sessions, and publication in peer-reviewed journals.

1  
2  
3 **Word count abstract: 393**  
4  
5

6 **Keywords:** Telephone triage, Netherlands Triage Standard, out of hours services in primary  
7 care, acute coronary syndrome, transient ischemic attack, stroke.  
8  
9

10  
11 **Strengths and limitations of this study**  
12  
13

- 14 • The first study that will assess the validity of the telephone triage in the OHS-PC setting in  
15 the domain of patients with symptoms suggestive of acute cardiovascular disease.
- 16 • We will also consider the final clinical outcome as the reference, not just 'expert opinion'.  
17
- 18 • Mixed methods applied in different sub-studies.  
19
- 20 • Result will provide new insights that will help improve patient safety and efficiency.  
21
- 22 • Limitations:  
23
  - 24 ○ Routine care data and therefore missing data on some variables of interest;  
25
  - 26 ○ Routine care diagnoses and therefore the risk of missing some cases with an acute  
27 cardiovascular disease.  
28  
29  
30  
31  
32  
33  
34  
35  
36  
37  
38  
39  
40  
41  
42  
43  
44  
45  
46  
47  
48  
49  
50  
51  
52  
53  
54  
55  
56  
57  
58  
59  
60

## Introduction

Digital decision support systems for telephone triage are widely used, also in primary care out of hours settings. For these settings, telephone triage systems were derived from triage systems applied in emergency department (ED) settings. An important difference, however, is that telephone triage systems do not include items related to face-to-face contact and physical examination. (1) In the Netherlands, a digital decision support system for telephone triage called the “Netherlands Triage Standard” (NTS) was introduced in 2011. (2) The NTS was constructed by an expert panel using (i) the Dutch national telephone guidelines for office hours in family practice (‘NHG triage index’) and (ii) a modified version of the Manchester Triage System (MTS) developed in the ED setting. (3) Since its introduction in 2011, the NTS has been used by most out-of-hours services in primary care (OHS-PC), and by approximately half of the ambulance dispatch centers in the Netherlands. (4) An important argument for using the same system within the ‘critical care chain’ was that it would facilitate communication during care transitions, and potentially improve transitional safety. (5)

Many studies assessed the diagnostic accuracy of triage systems in the ED setting. (6, 7) Yet, comparable studies on validity of telephone triage systems in primary care settings are limited. The validity of the five-level triage system for physical triage in the ED setting was evaluated in a systematic review of 57 studies. (1) Various reference standards for the assessment of validity were used; researchers’ own creation of a reference standard or combining severity with resource measures, e.g. hospital admissions. (1) Only one of the included studies in this review assessed the validity of the NTS, for both physical triage in the ED and for telephone triage in the OHS-PC. (5) For the assessment of telephone triage in OHS-PC, 6,668 patients were evaluated. Referrals to the ED and self-care advices were the two surrogate markers used as best proxies for adequate urgency allocation. Consequently, patients referred to the ED were considered as being correctly labelled as high urgency and those receiving a self-care advice as correctly low urgency, independent of the final diagnosis related to the episode. Not surprisingly, the researchers found an association between high urgencies and ED referrals and between low urgency level allocation by the triagist and self-care advices. Information on whether the urgency allocation was in line with the clinical outcomes is lacking. (5) There are no

other studies available that assessed the validity of the NTS for telephone triage in the OHS-PC setting or validated the NTS to the final diagnosis instead of to surrogate markers. (5, 8) Our study addresses this current knowledge gap.

Over the last decade, out of hours primary care in the Netherlands has been reorganised from small practices into larger OHS-PC. Patients primarily contact the OHS-PC when they need medical help outside office hours. In case of life-threatening symptoms, however, patients can also directly contact the emergency number of the ambulance dispatch center or directly visit the ED. At the OHS-PC, triage nurses trained in using the NTS handle all incoming calls, under supervision of a general practitioner (GP). (4) The goal of this telephone triage is to identify callers with the most urgent need of care. (9) With urgent clinical situations in mind the experts formulated the NTS questions in a hierarchically ordered algorithm; questions focusing on the symptoms and circumstances considered most critical first, followed by questions about less critical symptoms. (2) The triage nurse fills out the caller's responses in the semi-automatic NTS system, which then automatically generates urgency allocations. Within the NTS six possible urgency levels can be distinguished that are linked to the response time within which a caller should receive medical help (see table 1). The urgency level generated by the NTS can be adjusted by the triage nurse if the nurse disagrees with the NTS allocation (upgrading or downgrading). (9) Most often such adjustments are preceded by consultation of the supervising GP, who has the final responsibility for the urgency level allocation.

**Table 1. NTS levels of urgency (2, 5)**

| NTS Urgency level     | Definition                                | Response time                      | Medical help                              |
|-----------------------|-------------------------------------------|------------------------------------|-------------------------------------------|
| U0 – Resuscitation    | Loss of vital functions                   | Immediately                        | Ambulance                                 |
| U1 – Life threatening | Unstable vital functions                  | Within 15 minutes                  | Ambulance                                 |
| U2 – Emergent         | Vital functions in danger or organ damage | As soon as possible, within 1 hour | Home visit by GP or appointment at OHS-PC |
| U3 – Urgent           | Possible risk of damage,                  | A few hours (<3                    | Home visit by GP or                       |

|                 |                         |                         |                                           |
|-----------------|-------------------------|-------------------------|-------------------------------------------|
|                 | human reasons           | hours)                  | appointment at OHS-PC                     |
| U4 – Non-urgent | Marginal risk of damage | 24 hours                | Appointment at OHS-PC or telephone advice |
| U5 – Advice     | No risk of damage       | Advice, no time related | Telephone advice                          |

The aim of the NTS is to guarantee both efficient and safe care. Questions have been raised, however, about the current efficiency.<sup>(4)</sup> A national report showed an increase in high urgency allocations after the implementation of the NTS at the Dutch OHS-PC, notably U2 urgencies. (10) This is in contrast to the unchanged distribution of diseases, and suggests an increase of a more defensive triage strategy. In addition, a survey in 2016 among GPs revealed that the large majority (83.9%) believed that telephone triage with NTS resulted in (i) many unnecessary consultations and home visits in patients with non-urgent problems, and (ii) a high workload at the OHS-PC. (11) Also, media coverage of (fatal) adverse events has grown, and adverse event reports and investigation by the Dutch Health and Youth Care Inspectorate have been made publically available. (12) It is not unlikely that the increasing attention for (fatal) adverse events leads to more defensive triage to avoid such (fatal) adverse events, which potentially worsens efficiency. Thus, thorough research on the accuracy of the NTS is needed in order to assess whether improvements in the balance between efficiency and safety are required.

Callers with symptoms suggestive of acute cardiovascular diseases, e.g. acute coronary syndrome (ACS), or transient ischemic attack (TIA)/stroke generally receive high urgency allocations. (13) Chest pain is the most common reason for dispatching an ambulance (U1) with 60.7% of all ambulance rides deployed from the OHS-PC. (14) However, the incidence of ACS among patients experiencing chest discomfort in the Dutch primary care setting and referred to the hospital is low with around 10%. (15-17) The trade-off between efficiency and patient safety of telephone triage is particularly challenging in these cases. On the one hand, prompt detection of ACS or TIA/stroke is crucial to initiate interventions as early as possible and



1  
2  
3 prevent myocardial or brain necrosis, and improve prognosis. (18-20) On the other hand,  
4 overestimation of urgency results in unnecessary high workload, high referral rates, high costs,  
5 and potentially in iatrogenic damage of the caller. The discussion about balancing efficiency and  
6 safety is especially complicated because missing an acute myocardial infarction is the most  
7 common reason for malpractice claims worldwide. (21-23)  
8  
9  
10  
11  
12

13 Our ultimate goal is to improve the efficiency and safety of the triage of callers with symptoms  
14 suggestive of ACS or TIA/stroke who contact the OHS-PC, and to improve diagnosis. In the  
15 Safety First study we will evaluate real-life telephone triage recordings with corresponding  
16 urgency allocations, and patients' final clinical outcomes. Our research questions are (i) what is  
17 the diagnostic accuracy of the urgency allocation in callers with symptoms suggestive of ACS or  
18 TIA/stroke, (ii) which (clinical) determinants are predictive of an ACS or TIA/stroke diagnosis,  
19 and (iii) how is the NTS triage system used and how can it be improved in view of balancing  
20 efficiency and safety.  
21  
22  
23  
24  
25  
26  
27  
28  
29  
30  
31  
32  
33  
34  
35  
36  
37  
38  
39  
40  
41  
42  
43  
44  
45  
46  
47  
48  
49  
50  
51  
52  
53  
54  
55  
56  
57  
58  
59  
60

## Methods and analysis

### Design

An observational study in which telephone triage recordings from nine OHS-PC will be evaluated against the clinical outcomes. The researchers will listen to over 3,000 real-life recordings, and collect information on history taking and caller characteristics discussed during the telephone triage conversations. Besides these patient-specific items, we will also collect call characteristics (time of calling, duration of the contact, and who calls) and use triage information such as the main presenting symptom and the urgency allocation, available from the registered notes of both triage nurses and GPs. All information will be collected on an electronic case record form. The callers' own GPs will be asked to provide information about the diagnosis related to the OHS-PC contact, based on his/her medical record of the caller, including medical specialist or hospital discharge letters.

### Setting

The foundation 'Primair Huisartsenposten' is a collaboration of six OHS-PC located in the central part of the Netherlands that provides out-of-hours primary care for approximately 1,5 million residents. It is one of the largest OHS-PC collaborations in the Netherlands and it covers both rural and urban areas. All telephone calls are routinely recorded and archived for training, quality control, and research purposes in a computer program called 'Callmanager'. Archiving is based on the International Classification of Primary Care (ICPC) code. (24) ICPC codes allow for classification of symptoms and diagnoses in the electronic patient records. The standardisation of the coding facilitates (inter)national comparison of primary care diagnoses. At Dutch OHS-PC both triage nurses and GPs assign ICPC codes to patient contacts manually.

A weighted sample of triage recordings representing callers with symptoms suggestive of ACS or TIA/stroke will be retrospectively collected from the years 2014-2016. Weighting is based on the actual distribution of ICPC codes at the OHS-PC, and thus best reflects current practice. Per ICPC code a random sample will be taken.

### Inclusion and exclusion criteria

Telephone triage recordings of callers of the OHS-PC with complaints that lead to suspicion of ACS or TIA/stroke will be included. The selection of recordings is based on (i) specific ICPC codes and (ii) a selection of keywords used in Callmanager (figure 1). As the specific ICPC codes may not cover all eligible callers due to interrater variability, we choose to select cases on both ICPC codes and keywords in free text in order to include the broadest range possible of patients with typical and less typical symptoms that could all be considered to be caused by underlying ACS or TIA/stroke. A major exclusion criterion is other recordings than triage conversations, e.g. calls between colleagues. All exclusion criteria are displayed in table 2.

**Table 2. Inclusion and exclusion criteria for participation in the Safety First study**

| Inclusion criteria                                                                                                                                                                                                                                                                                                                                                                                                                                                                                                                                                                                                                                                                                                                                                                                                 | Exclusion criteria                                                                                                                                                                                                                                                                                                                                                                                           |
|--------------------------------------------------------------------------------------------------------------------------------------------------------------------------------------------------------------------------------------------------------------------------------------------------------------------------------------------------------------------------------------------------------------------------------------------------------------------------------------------------------------------------------------------------------------------------------------------------------------------------------------------------------------------------------------------------------------------------------------------------------------------------------------------------------------------|--------------------------------------------------------------------------------------------------------------------------------------------------------------------------------------------------------------------------------------------------------------------------------------------------------------------------------------------------------------------------------------------------------------|
| <ul style="list-style-type: none"> <li>• Recordings of triage conversations of callers with symptoms suggestive of ACS based on (i) the following ICPC codes in 'Callmanager': K01, K02, K03, K24, K74, K75, K76, K77, K93, L04, P74, R02, R98; and (ii) key word selection: thoracic pain, chest pain, myocardial infarction, heart attack and their common abbreviations.</li> <li>• Recordings of triage conversations of callers with symptoms suggestive of TIA or stroke based on (i) the following ICPC codes in 'Callmanager': K89, K90, N17, N18, N19, N29, N89, N91; and (ii) key word selection: TIA, stroke, cerebral or brain bleeding or haemorrhage or infarction, neurological deficit, arm or leg weakness, face or mouth drooping, speech or visual problems or sensory disturbances.</li> </ul> | <ul style="list-style-type: none"> <li>• No triage conversation, but consultation, e.g. between colleagues or questions about medication use</li> <li>• Poor quality recordings</li> <li>• Callers younger than 18 years</li> <li>• Callers not living in the catchment area of the OHS-PC</li> <li>• Callers enlisted with a GP who refused to provide information on the final clinical outcome</li> </ul> |

## Figure 1. Flowchart of the Safety First study

### Data analysis

(i) The diagnostic accuracy of the urgency allocation on two separate outcomes: ACS, or TIA/stroke, will be calculated in terms of sensitivity, specificity, positive and negative predictive values. In addition, we will perform sensitivity analyses; a) also considering other emergency cases with chest discomfort, e.g. pulmonary embolism, acute heart failure, and thoracic aortic dissection, or in the domain symptoms suggestive of TIA/stroke; b) other emergency cases with neurological symptoms, e.g. subarachnoidal haemorrhage (SAH), epilepsy.

(ii) Multivariable logistic regression analysis will be applied to identify history items or caller characteristics that independently predict either ACS or TIA/stroke. In addition, multivariable models will be developed that predict the presence of respectively ACS, or TIA/stroke, and the C-statistic with the 95% confidence interval will be calculated after bootstrapping to correct for over-optimism. (25) Before multivariable analysis, multiple imputation techniques will be applied for missing values. Variables with more than 50% missings will not be considered. Variable selection will be based on literature review (known diagnostic predictors in both domains) and on univariable analysis (inclusion of variables with  $p < 0.15$ ). Special attention will be paid to gender and age, either as interaction term or by calculating gender and/or age-specific prediction models. All data analyses will be performed using SPSS statistical software program version 25.0.

### Blinding of researchers

All researchers listening to the recordings, and filling out the electronic case record forms or who are otherwise involved in the Safety First study, e.g. the expert panel of one of our sub-studies, will be blinded to the callers' clinical outcomes.

### Power calculation

For the power calculation we used the recommendations that apply to diagnostic studies. (21) Records of 2014-2016 were used and after application of the exclusion criteria two random samples of 2,000 recordings with 'symptoms suggestive of ACS' and 1,000 recordings with 'symptoms suggestive of TIA/stroke' will be drawn. A prior pilot study showed that 1 out of 9 callers symptoms suggestive of ACS is, after diagnostic work-up, diagnosed with ACS and 1 out of 2 callers symptoms suggestive for TIA-stroke is diagnosed with TIA or stroke. Based on Harrell's rule of thumb, for ACS 2,000 audio-tapes allows to analyse 23 variables and for TIA-stroke 1,000 audio tapes, both with follow up data allowing to analyse 50 diagnostic items. (26)

### **Sub-studies**

As part of the Safety First study, three sub-studies will be carried out designed to further expand the knowledge about the triage process at OHS-PC.

#### (i) A case-control study on calamities

A calamity is defined as an adverse event with serious permanent patient harm or death as a consequence. (27) By Dutch law, root cause analysis (RCA) of every single calamity is required. RCA often points at flaws in the triage process as root causes for such calamities, resulting in an array of improvement measures for daily practice. However, it is unknown whether cases that result in a calamity really differ from those not evolving into a calamity, as all only have been evaluated as individual cases by experts knowing they evaluated a calamity and their assessment is thus prone to hindsight bias. (28, 29) In the OHS-PC setting calamities are very rare (0.006%) and the majority is of cardiovascular origin, e.g. missed acute myocardial infarction (AMI). (30) The aim of this sub-study is to provide a more thorough view on missed or too late diagnosed AMIs that resulted in calamities by comparing these cases with matched controls in the domain of callers with chest pain, either due to ACS or not. The main question is whether the calamity cases actually differ from controls with respect to call and patient characteristics. Archived triage conversations from the period January 2013 – December 2017

1  
2  
3 of the calamity cases (defined as a missed diagnosis of AMI) will be compared with triage  
4 conversations of controls not meeting the calamity definition but also contacting the OHS-PC  
5 with symptoms suggestive of ACS. Per calamity case 8 controls will be matched to the case  
6 according to age, gender and symptom presentation. A researcher blinded to the outcome will  
7 extract information regarding call characteristics, caller characteristics and urgency allocation,  
8 and will insert all data in a database. An expert panel of experienced GPs blinded to the final  
9 outcome (calamity or no calamity), thus without case specific hindsight bias, will evaluate the  
10 triage conversations and the diagnostic accuracy (sensitivity, specificity, predictive values) of  
11 safe triage handling will be calculated.  
12  
13  
14  
15  
16  
17  
18  
19  
20

### 21 (ii) Conversation analysis study

22  
23  
24 In this sub-study we will assess how conversation aspects may affect the urgency allocation  
25 during telephone triage. The ways in which obligatory NTS questions and other questions are  
26 formulated by the triage nurse, and responded to by the conversation partner may provide  
27 more thorough insight into question-answer sequences at the OHS-PC that can be helpful to  
28 improve the (use of) the NTS. We will transcribe a sample of the case-control study triage  
29 conversations according to the Jefferson conventions, and the transcripts will be qualitatively  
30 analysed with established conversation analysis techniques. (31-33) We will specifically focus  
31 on either/or questions and their various formats (e.g. two-choice, multiple choice, open-ended  
32 or tag format) in the urgency decision phase of the triage calls.  
33  
34  
35  
36  
37  
38  
39  
40

### 41 (iii) Interview study with triage nurses

42  
43  
44 Finally, we will perform a qualitative interview study of triage nurses with the aim to gain more  
45 knowledge on triage nurses' reasoning during telephone triage of callers with symptoms  
46 suggestive of ACS or TIA/stroke, and how they use the NTS for decision making in these two  
47 domains. We will conduct semi-structured audio-stimulated recall interviews. (34) Per interview  
48 one or two recordings from a recent shift at the OHS-PC will be used to stimulate triage nurses'  
49 reflections. The interviews will be transcribed and the transcripts will be qualitatively analysed  
50 according to the principles of the grounded theory approach. (35)  
51  
52  
53  
54  
55  
56  
57  
58  
59  
60

### **Patient and public involvement**

Patients were not directly involved in the design of this study, but representatives participate in the stakeholders meetings every 6 months together with other representatives, i.e. of the local and national OHS-PC organization and the Dutch Health and Youth Care Inspectorate. They provide crucial input that helps us with formulating additional, clinically relevant research questions.

### **Ethics and dissemination**

The Medical Ethics Committee of the University Medical Centre Utrecht, the Netherlands endorsed this study (National Trial Register (NTR) identification number: NTR7331). All personal data, as well as all research data were stored anonymized according to the European General Data Protection Regulation. Data collection started in January 2016 and will last until December 2020. Communications and publications on the results will not enable identification of individual callers. Results will be disseminated to relevant primary care communities in peer-reviewed journals, and at scientific conferences. In addition, this research project will also result in two PhD theses.

## Discussion

The Safety First study will provide diagnostic accuracy data on ACS and TIA/stroke in the primary care setting. The efficiency and safety of the NTS in the out-of-hours primary care setting will be evaluated for callers with symptoms suggestive of ACS or TIA/stroke. In a case-control study we will explore calamities (missed acute myocardial infarctions) and assess whether they differ from controls (other patients with symptoms suggestive of ACS but not fulfilling the calamity criteria) with respect to call and patient characteristics. With qualitative studies we will generate more thorough knowledge on how triage nurses work and how the NTS is used.

### Efficiency and patient safety

A systematic review about patient safety in the OHS-PC setting concluded that 10% of all OHS-PC calls could be considered as 'unsafe'. (36) However, the claim of 'unsafe' calls was based on surrogate markers, and not on patients' clinical outcomes, and clearly contrasts with the very low incidence of calamities (0.006%). (30) By using the patients' final clinical outcomes as the reference, the Safety First study will address an important knowledge gap on diagnostic accuracy of telephone triage. In addition, our study will provide a more complete view on the patient safety of the NTS than can be achieved with root cause analysis of individual cases only, often resulting in the conclusion that the urgency level is underestimated. (30, 37) It is difficult to define when telephone triage at the OHS-PC is safe. Our case-control study will provide deeper knowledge on telephone conversations that resulted in calamities and their matched controls. This knowledge might put the general view in a different perspective on (i) analysing calamities, and (ii) the weight that is assigned to improvement measures.

### Users of the NTS

A questionnaire among Dutch GPs working at the OHS-PCs reported that a majority of GPs (83.9%) believe that nowadays telephone triage contributes to overconsumption of care at



1  
2  
3 OHS-PC. About 85% of responders consider this to be at least partly attributable to the level of  
4 experience and education, and the attitude and personality of the triage nurses. (11) As the  
5 performance of the NTS is inextricably linked to its users, we want to include conversation  
6 analysis and interview studies with triagists. The quality of telephone triage is highly dependent  
7 on the quality of communication between the triage nurse and the caller, and therefore the  
8 communication skills of triage nurses. (22, 38) Moreover, they have to deal with callers who  
9 greatly vary in their ability to communicate effectively and coherently. (39, 40) Additionally, the  
10 telephone triage is necessarily only based on oral information provided by the caller, lacking  
11 any visual cues or diagnostic information from physical examination. Our sub-study on  
12 conversation analysis will add knowledge on the ways in which questions and answers are  
13 formulated by triage nurses and callers, and how this affects the triage conversation.  
14 Secondly, we will also focus on the obligatory question structure within the NTS, and how this  
15 affects the users. The NTS is a semi-automatic support system that is heavily dependent on the  
16 input of the triage nurses themselves; which 'main presenting problem' he/she chooses is  
17 based on the initial information from the caller, and each of the in total 57 'presenting  
18 problems' are linked to a separate algorithm of hierarchically organized, pre-specified  
19 questions. These questions need to be filled out before the NTS generates an urgency  
20 allocation. (41) Previous studies suggested that triage nurses may experience interactional  
21 dilemmas while working with a computer decision support. (42) Our interview study will  
22 provide more insight into triage nurses' clinical reasoning process during telephone triage, and  
23 how they use the NTS for decision making within the domains of callers with symptoms  
24 suggestive of ACS or TIA/stroke. This information can help improve the workability of NTS in  
25 daily practice. Furthermore, in these domains the knowledge that 'time is muscle' or 'time is  
26 brain' puts extra strain on the triage nurse, because unnecessary delays directly affect  
27 morbidity and mortality of patients who actually show to have ACS or TIA/stroke. (18, 19)  
28 Beside this stress factor, other factors such as shiftwork, fatigue, multitasking and understaffing  
29 can attribute to the risk of errors during the triage process. (22) In our interview study we want  
30 to include these risk factors, and their possible influence on the reasoning process of triage  
31 nurses.  
32  
33  
34  
35  
36  
37  
38  
39  
40  
41  
42  
43  
44  
45  
46  
47  
48  
49  
50  
51  
52  
53  
54  
55  
56  
57  
58  
59  
60

## Conclusion

Our Safety First study will provide diagnostic accuracy data on ACS and TIA/stroke, and new insights on efficiency and patient safety during telephone triage of callers with symptoms suggestive of ACS or TIA/stroke at the OHS-PC. Results from our study will help to improve the telephone triage in these important domains and improve both efficiency and safety for callers.

For peer review only

### List of abbreviations

ACS: Acute Coronary Syndrome; AMI: Acute Myocardial Infarction; ED: Emergency Department; TIA: Transient Ischemic Attack; GP: General Practitioner; NTS: Netherlands Triage Standard, OHS-PC: Out-Of-Hours Services in Primary Care.

### Author contributions

DLZ and FHR designed the study and gained funding. LTW, and DCE prepared the manuscript, and DLZ, FHR, RAD, EDG and AWH provided intellectual input and reviewed the manuscript. DCE and LTW carry out the study. All authors read and approved the final manuscript.

### Funding statement

This work was supported by the department of general practice of the University Medical Centre Utrecht, Associate Professorship-promotion grant of D.L. Zwart (MD, PhD), the foundation 'Netherlands Triage Standard' and the foundation 'Stoffels-Hornstra'. The views expressed are those of the authors and not necessarily those of the foundations. This research was conducted without direct involvement from both funding foundations.

### Competing interests statement

The authors declare that they have no competing interests.

### Acknowledgements

The authors thank the OHS-PC foundation 'Primair Huisartsenposten' and all employees of the participating locations for their cooperation in this study, notably for providing data and technical support.

**Word count manuscript: 4156**

## References

1. Kuriyama A, Urushidani S, Nakayama T. Five-level emergency triage systems: variation in assessment of validity. *Emergency medicine journal : EMJ*. 2017;34(11):703-10.
2. Netherlands Triage Standard [cited 2018 June 22]. Available from: <http://de-nts.nl/>.
3. National guidelines for telephone triage and advice in Family Practice [cited 2018 June 22]. Available from: <https://www.nhg.org/winkel/producten/nhg-triagewijzer-versie-2016>.
4. Smits M, Rutten M, Keizer E, Wensing M, Westert G, Giesen P. The Development and Performance of After-Hours Primary Care in the Netherlands: A Narrative Review. *Annals of internal medicine*. 2017;166(10):737-42.
5. van Ierland Y, van Veen M, Huibers L, Giesen P, Moll HA. Validity of telephone and physical triage in emergency care: the Netherlands Triage System. *Family practice*. 2011;28(3):334-41.
6. Nishi F, de Oliveira Motta Maia F, de Souza Santos I, de Almeida Lopes Monteiro da Cruz D. Assessing sensitivity and specificity of the Manchester Triage System in the evaluation of acute coronary syndrome in adult patients in emergency care: a systematic review. *JBIC Database of Systematic Reviews and Implementation Reports*. 2017;15(6):1747-61.
7. Steiner D, Renetseder F, Kutz A, Haubitz S, Faessler L, Anderson JB, et al. Performance of the Manchester Triage System in Adult Medical Emergency Patients: A Prospective Cohort Study. *J Emerg Med*. 2016;50(4):678-89.
8. Lake R, Georgiou A, Li J, Li L, Byrne M, Robinson M, et al. The quality, safety and governance of telephone triage and advice services - an overview of evidence from systematic reviews. *BMC health services research*. 2017;17(1):614.
9. Blank L, Coster J, O'Cathain A, Knowles E, Tosh J, Turner J, et al. The appropriateness of, and compliance with, telephone triage decisions: a systematic review and narrative synthesis. *J Adv Nurs*. 2012;68(12):2610-21.
10. Jansen T, de Hoon S, Hek K, Verheij R. Developments at the out-of-hours services in primary care. Changes in care demand and health care issues in 2013-2015. [Ontwikkelingen op de huisartsenpost. Veranderingen in zorgvraag en gezondheidsproblemen in 2013-2015.]. NIVEL, 2017.
11. Keizer E, Maassen I, Smits M, Wensing M, Giesen P. Reducing the use of out-of-hours primary care services: A survey among Dutch general practitioners. *The European journal of general practice*. 2016;22(3):189-95.
12. Dutch Health and Youth Care Inspectorate, IGJ. Learning from incident reports in openness. Learn and improve, working together on further improvement of quality of care. [In openheid leren van meldingen. Leren en verbeteren, samen werken aan verdere verbetering van kwaliteit van zorg.]. Dutch Ministry of Health, Welfare and Sport; 2016.
13. Smits M, Verheij R. Changes in urgency of contacts with the out-of-hours services in primary care 2013-2016. [Veranderingen in de urgentie van contacten met de huisartsenpost 2013-2016.]. NIVEL, 2017.
14. Plat FM, Peters YAS, Loots FJ, de Groot CJA, Eckhardt T, Keizer E, et al. Ambulance dispatch versus general practitioner home visit for highly urgent out-of-hours primary care. *Family practice*. 2017(Dec 20).
15. Hoorweg BB, Willemsen RT, Cleef LE, Boogaerts T, Buntinx F, Glatz JF, et al. Frequency of chest pain in primary care, diagnostic tests performed and final diagnoses. *Heart*. 2017;103(21):1727-32.
16. Wibring K, Herlitz J, Christensson L, Lingman M, Bang A. Prehospital factors associated with an acute life-threatening condition in non-traumatic chest pain patients - A systematic review. *International journal of cardiology*. 2016;219:373-9.
17. Rawshani A, Larsson A, Gelang C, Lindqvist J, Gellerstedt M, Bang A, et al. Characteristics and outcome among patients who dial for the EMS due to chest pain. *International journal of cardiology*. 2014;176(3):859-65.

18. Bosner S, Haasenritter J, Becker A, Karatolios K, Vaucher P, Gencer B, et al. Ruling out coronary artery disease in primary care: development and validation of a simple prediction rule. *CMAJ : Canadian Medical Association journal = journal de l'Association medicale canadienne*. 2010;182(12):1295-300.
19. Berglund A, von Euler M, Schenck-Gustafsson K, Castren M, Bohm K. Identification of stroke during the emergency call: a descriptive study of callers' presentation of stroke. *BMJ open*. 2015;5(4):e007661.
20. Leathley MJ, Jones SP, Gibson JM, Ford GA, McAdam JJ, Quinn T, et al. "Can you send an ambulance please?": a comparison of callers' requests for emergency medical dispatch in non-stroke and stroke calls. *Emergency medicine journal : EMJ*. 2014;31(e1):e25-8.
21. Ernesater A, Winblad U, Engstrom M, Holmstrom IK. Malpractice claims regarding calls to Swedish telephone advice nursing: what went wrong and why? *J Telemed Telecare*. 2012;18(7):379-83.
22. Roing M, Holmstrom IK. Malpractice claims in Swedish telenursing: lessons learned from interviews with telenurses and managers. *Nurs Res*. 2015;64(1):35-43.
23. Katz HP, Kaltsounis D, Halloran L, Mondor M. Patient safety and telephone medicine : some lessons from closed claim case review. *J Gen Intern Med*. 2008;23(5):517-22.
24. The Dutch College of General Practitioners, NHG. The International Classification of Primary Care (ICPC). Version 6 (Dutch translation derived from ICPC-1 by the WONCA International Classification Committee). 2018. Available from: <https://www.nhg.org/themas/artikelen/icpc>.
25. Efron BT, R. An introduction to the bootstrap. Monographs on statistics and applied probability. New York: Chapman & Hall; 1993.
26. Harrell FE, Jr., Lee KL, Califf RM, Pryor DB, Rosati RA. Regression modelling strategies for improved prognostic prediction. *Stat Med*. 1984;3(2):143-52.
27. Healthcare Quality, Complaints and Disputes Act (WKKKGZ), (2016).
28. Henriksen K, Kaplan H. Hindsight bias, outcome knowledge and adaptive learning. *Qual Saf Health Care*. 2003;12 Suppl 2:ii46-50.
29. Zwaan L, Monteiro S, Sherbino J, Ilgen J, Howey B, Norman G. Is bias in the eye of the beholder? A vignette study to assess recognition of cognitive biases in clinical case workups. *BMJ Qual Saf*. 2017;26(2):104-10.
30. Rutten MH, Kant J, Giesen P. What can we learn from calamities at out-of-hours services in primary care? [Wat kunnen we leren van calamiteiten op de huisartsenpost?]. *Huisarts Wet*. 2018;6(61).
31. Jefferson G. A technique for inviting laughter and its subsequent acceptance/declination. . In: Psathas G, editor. *Everyday language: Studies in ethnomethodology*. New York, London: Irvington; 1979. p. 79-96.
32. Jefferson G. On a failed hypothesis: conjunctionals as overlap-vulnerable. In: Brabant KU, editor. *Tilburg papers in language and literature*. Tilburg1983. p. 1-33.
33. Jefferson G. Notes on a possible metric which provides for a 'standard maximum' silence of approximately one second in conversation. In: Brabant KU, editor. *Tilburg papers in language and literature*. Tilburg1983. p. 1-83.
34. Dempsey N. Stimulated recall interviews in ethnography. *Qualitative sociology*. 2010;33(3):349-67.
35. Kolb SM. Grounded theory and the constant comparative method: valid research strategies for educators. *Journal of Emerging Trends in Educational Research and Policy Studies*. 2012;3:83-6.
36. Huibers L, Smits M, Renaud V, Giesen P, Wensing M. Safety of telephone triage in out-of-hours care: a systematic review. *Scandinavian journal of primary health care*. 2011;29(4):198-209.
37. Annual reports of 2014 and 2015. [Jaarverslagen 2014 en 2015.]. Utrecht, The Netherlands: Foundation Primair out-of-hours services in primary care [Stichting Primair Huisartsenposten]
38. Holmstrom I. Decision aid software programs in telenursing: not used as intended? Experiences of Swedish telenurses. *Nurs Health Sci*. 2007;9(1):23-8.
39. Pettinari CJ, Jessopp L. "Your ears become your eyes": managing the absence of visibility in NHS Direct. *J Adv Nurs*. 2001;36(5):668-75.

- 1  
2  
3 40. Roing M, Rosenqvist U, Holmstrom IK. Threats to patient safety in telenursing as revealed in  
4 Swedish telenurses' reflections on their dialogues. *Scand J Caring Sci.* 2013;27(4):969-76.  
5 41. Smits M, Keizer E, Ram P, Giesen P. Development and testing of the KERNset: an instrument to  
6 assess the quality of telephone triage in out-of-hours primary care services. *BMC health services research.*  
7 2017;17(1):798.  
8 42. Murdoch J, Barnes R, Pooler J, Lattimer V, Fletcher E, Campbell JL. The impact of using  
9 computer decision-support software in primary care nurse-led telephone triage: interactional dilemmas  
10 and conversational consequences. *Soc Sci Med.* 2015;126:36-47.  
11  
12  
13  
14  
15  
16  
17  
18  
19  
20  
21  
22  
23  
24  
25  
26  
27  
28  
29  
30  
31  
32  
33  
34  
35  
36  
37  
38  
39  
40  
41  
42  
43  
44  
45  
46  
47  
48  
49  
50  
51  
52  
53  
54  
55  
56  
57  
58  
59  
60

For peer review only

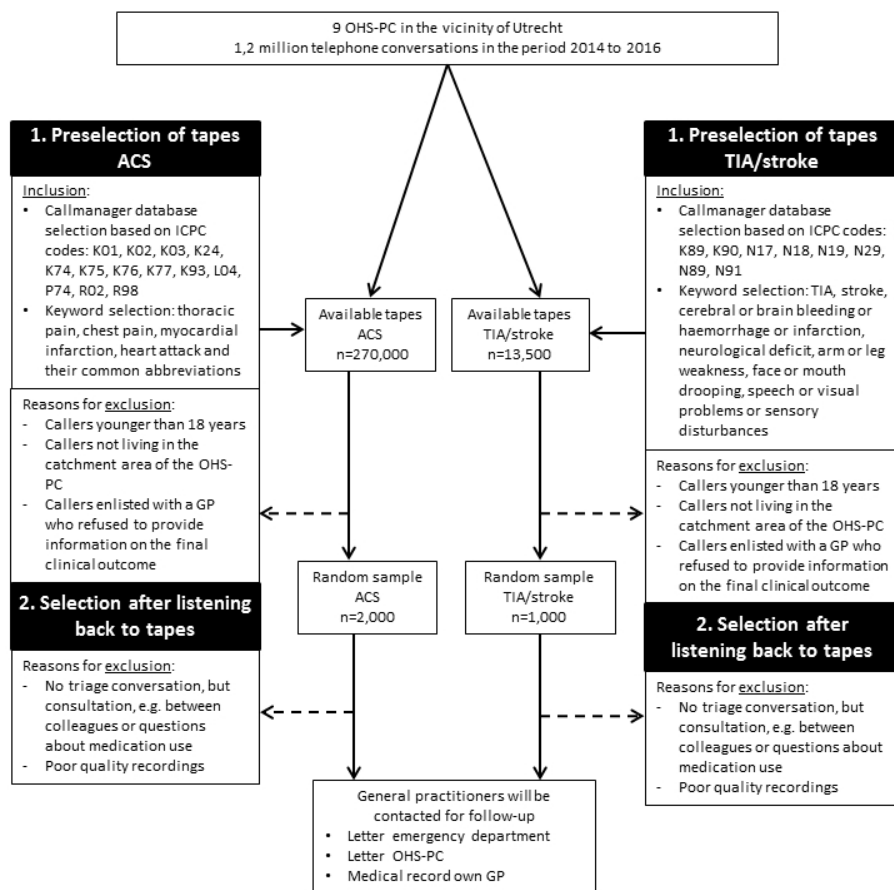

Figure 1. Flowchart of the Safety First study

190x254mm (96 x 96 DPI)

# BMJ Open

## Optimisation of telephone triage of callers with symptoms suggestive of acute cardiovascular disease in out of hours primary care: observational design of the Safety First study

|                                 |                                                                                                                                                                                                                                                                                                                                                                                                                                                                                                                                                                                                                                                                                                                                                                                                                                                                                                      |
|---------------------------------|------------------------------------------------------------------------------------------------------------------------------------------------------------------------------------------------------------------------------------------------------------------------------------------------------------------------------------------------------------------------------------------------------------------------------------------------------------------------------------------------------------------------------------------------------------------------------------------------------------------------------------------------------------------------------------------------------------------------------------------------------------------------------------------------------------------------------------------------------------------------------------------------------|
| Journal:                        | <i>BMJ Open</i>                                                                                                                                                                                                                                                                                                                                                                                                                                                                                                                                                                                                                                                                                                                                                                                                                                                                                      |
| Manuscript ID                   | bmjopen-2018-027477.R1                                                                                                                                                                                                                                                                                                                                                                                                                                                                                                                                                                                                                                                                                                                                                                                                                                                                               |
| Article Type:                   | Protocol                                                                                                                                                                                                                                                                                                                                                                                                                                                                                                                                                                                                                                                                                                                                                                                                                                                                                             |
| Date Submitted by the Author:   | 21-Jan-2019                                                                                                                                                                                                                                                                                                                                                                                                                                                                                                                                                                                                                                                                                                                                                                                                                                                                                          |
| Complete List of Authors:       | Erkelens, Daphne; University Medical Center Utrecht, Utrecht University, Julius Center for Health Sciences and Primary Care<br>Wouters, Loes; University Medical Center Utrecht, Utrecht University, Julius Center for Health Sciences and Primary Care<br>Zwart, D.L; University Medical Center Utrecht, Utrecht University, Julius Center for Health Sciences and Primary Care<br>Damoiseaux, Roger; University Medical Center Utrecht, Utrecht University, Julius Center for Health Sciences and Primary Care<br>De Groot, Esther; University Medical Center Utrecht, Utrecht University, Julius Center for Health Sciences and Primary Care<br>Hoes, Arno; University Medical Center Utrecht, Utrecht University, Julius Center for Health Sciences and Primary Care<br>Rutten, Frans; University Medical Center Utrecht, Utrecht University, Julius Center for Health Sciences and Primary Care |
| <b>Primary Subject Heading</b>: | Cardiovascular medicine                                                                                                                                                                                                                                                                                                                                                                                                                                                                                                                                                                                                                                                                                                                                                                                                                                                                              |
| Secondary Subject Heading:      | General practice / Family practice, Neurology                                                                                                                                                                                                                                                                                                                                                                                                                                                                                                                                                                                                                                                                                                                                                                                                                                                        |
| Keywords:                       | PRIMARY CARE, Stroke < NEUROLOGY, After hours care, Acute coronary syndrome, Transient ischemic attack, Telephone triage                                                                                                                                                                                                                                                                                                                                                                                                                                                                                                                                                                                                                                                                                                                                                                             |
|                                 |                                                                                                                                                                                                                                                                                                                                                                                                                                                                                                                                                                                                                                                                                                                                                                                                                                                                                                      |

SCHOLARONE™  
Manuscripts



1  
2  
3 **Optimisation of telephone triage of callers with symptoms suggestive of acute cardiovascular**  
4 **disease in out of hours primary care: observational design of the Safety First study**  
5  
6

7  
8 D.C. Erkelens<sup>1\*</sup>, L.T. Wouters<sup>1\*</sup>, D.L. Zwart<sup>1</sup>, R.A. Damoiseaux<sup>1</sup>, E. de Groot<sup>1</sup>, A.W. Hoes<sup>1</sup>, F.H.  
9 Rutten<sup>1</sup>  
10

11  
12  
13 \*Both authors contributed equally

14  
15 <sup>1</sup>Julius Centre for Health Sciences and Primary Care, Department of General Practice, University  
16 Medical Centre Utrecht, Utrecht University, Utrecht, The Netherlands.  
17  
18

19  
20  
21  
22 **Corresponding author:** D.C. Erkelens<sup>1</sup>, MD, PhD candidate, Julius Centre for Health Sciences and  
23 Primary Care, University Medical Centre Utrecht, Utrecht University. Address: STR 6.131, PO  
24 Box 85500, 3508 GA Utrecht, The Netherlands. Phone number: +31 (0)88 75 69289. Email:  
25 [D.C.A.Erkelens@umcutrecht.nl](mailto:D.C.A.Erkelens@umcutrecht.nl)  
26  
27  
28  
29  
30  
31

32 The Netherlands National Trial Register identification number: NTR7331.  
33  
34  
35  
36  
37  
38  
39  
40  
41  
42  
43  
44  
45  
46  
47  
48  
49  
50  
51  
52  
53  
54  
55  
56  
57  
58  
59  
60

## Abstract

**Introduction:** In the Netherlands, the “Netherlands Triage Standard” (NTS) is frequently used as digital decision support system for telephone triage at out-of-hours primary care services (OHS-PC). Aim of NTS is to guarantee accessible, efficient and safe care. However, there are indications that current triage is inefficient, with overestimation of urgency, notably in suspected acute cardiovascular disease. In addition, in primary care setting the NTS has only been validated against surrogate markers, and diagnostic accuracy with clinical outcomes as the reference is unknown. In the Safety First study, we address this gap in knowledge by describing, understanding and improving the diagnostic process and urgency allocation in callers with symptoms suggestive of acute cardiovascular disease, in order to improve both efficiency and safety of telephone triage in this domain.

**Methods and analysis:** An observational study in which 3,000 telephone triage recordings (period 2014-2016) will be analysed. Information is collected from the recordings including caller- and symptom characteristics and urgency allocation. The callers' own general practitioners are contacted for the final diagnosis of each contact. We included recordings of callers with symptoms suggestive of acute coronary syndrome (ACS) or transient ischemic attack (TIA)/stroke. With univariable and multivariable logistic regression analyses the diagnostic accuracy of caller- and symptom characteristics will be analysed in terms of predictive values with urgency level, and ACS and TIA/stroke as outcomes, respectively. To further improve our understanding of the triage process at OHS-PC, we will carry out additional studies applying both quantitative and qualitative methods; (i) case-control study on calamities, (ii) conversation analysis study, and (iii) interview study with triage nurses.

**Ethics and dissemination:** The Medical Ethics Committee of the University Medical Centre Utrecht, the Netherlands endorsed this study (National Trial Register identification: NTR7331). Results will be disseminated at scientific conferences, regional educational sessions, and publication in peer-reviewed journals.

**Word count abstract: 300**

1  
2  
3 **Keywords:** Telephone triage, Netherlands Triage Standard, out of hours services in primary  
4 care, after hours care, acute coronary syndrome, transient ischemic attack, stroke.  
5  
6  
7

8 **Strengths and limitations of this study**  
9

- 10  
11 • We will assess the accuracy of the telephone triage in the OHS-PC setting in the domain of  
12 patients with symptoms suggestive of acute cardiovascular disease.  
13  
14 • We will apply the actual clinical outcome as the reference, not just 'expert opinion'.  
15  
16 • New insights retrieved by our 'holistic approach' will help improve both patient safety and  
17 efficiency.  
18  
19 • Use of routine care data and therefore missing data on some variables of interest.  
20  
21 • Routine care diagnoses and therefore the risk of missing some cases with an unrecognized  
22 acute cardiovascular disease.  
23  
24  
25  
26  
27  
28  
29  
30  
31  
32  
33  
34  
35  
36  
37  
38  
39  
40  
41  
42  
43  
44  
45  
46  
47  
48  
49  
50  
51  
52  
53  
54  
55  
56  
57  
58  
59  
60

## Introduction

Digital decision support systems for telephone triage are widely used, also in primary care out of hours settings. For these settings, telephone triage systems were derived from triage systems applied in emergency department (ED) settings. An important difference, however, is that telephone triage systems do not include items related to face-to-face contact and physical examination. (1) In the Netherlands, a digital decision support system for telephone triage called the “Netherlands Triage Standard” (NTS) was introduced in 2011. (2) The NTS was constructed by an expert panel using (i) the Dutch national telephone guidelines for office hours in family practice (‘NHG triage index’) and (ii) a modified version of the Manchester Triage System (MTS) developed in the ED setting. (3) Since its introduction in 2011, the NTS has been used by most out-of-hours services in primary care (OHS-PC), and by approximately half of the ambulance dispatch centres in the Netherlands. (4) An important argument for using the same system within the ‘critical care chain’ was that it would facilitate communication during care transitions, and potentially improve transitional safety. (5)

Many studies assessed the diagnostic accuracy of triage systems in the ED setting. (6, 7) Yet, comparable studies on validity of telephone triage systems in primary care settings are limited. The validity of the five-level triage system for physical triage in the ED setting was evaluated in a systematic review of 57 studies. (1) Various reference standards for the assessment of validity were used; researchers’ own creation of a reference standard or combining severity with resource measures, e.g. hospital admissions. (1) Only one of the included studies in this review assessed the validity of the NTS, for both physical triage in the ED and for telephone triage in the OHS-PC. (5) For the assessment of telephone triage in OHS-PC, 6,668 patients were evaluated. Referrals to the ED and self-care advices were the two surrogate markers used as best proxies for adequate urgency allocation. Consequently, patients referred to the ED were considered as being correctly labelled as high urgency and those receiving a self-care advice as correctly low urgency, independent of the final diagnosis related to the episode. Not surprisingly, the researchers found an association between high urgencies and ED referrals and between low urgency level allocation by the triage nurse and self-care advices. Information on

whether the urgency allocation was in line with the clinical outcomes is lacking. (5) There are no other studies available that assessed the validity of the NTS for telephone triage in the OHS-PC setting or validated the NTS to the final diagnosis instead of to surrogate markers. (5, 8) Our study addresses this current knowledge gap.

Over the last decade, out of hours primary care in the Netherlands has been reorganised from small practices into larger OHS-PC. Patients primarily contact the OHS-PC when they need medical help outside office hours. In case of life-threatening symptoms, however, patients can also directly contact the emergency number of the ambulance dispatch centres or directly visit the ED. At the OHS-PC, triage nurses trained in using the NTS handle all incoming calls, under supervision of a general practitioner (GP). (4) The goal of this telephone triage is to identify callers with the most urgent need of care. (9) With urgent clinical situations in mind the experts formulated the NTS questions in a hierarchically ordered algorithm; questions focusing on the symptoms and circumstances considered most critical first, followed by questions about less critical symptoms. (2) The triage nurse fills out the caller's responses in the semi-automatic NTS system, which then automatically generates urgency allocations. Within the NTS six possible urgency levels can be distinguished that are linked to the response time within which a caller should receive medical help (see table 1). The urgency level generated by the NTS can be adjusted by the triage nurse if the nurse disagrees with the NTS allocation (upgrading or downgrading). (9) Most often such adjustments are preceded by consultation of the supervising GP, who has the final responsibility for the urgency level allocation.

**Table 1. NTS levels of urgency (2, 5)**

| NTS Urgency level     | Definition                                | Response time                      | Medical help                            |
|-----------------------|-------------------------------------------|------------------------------------|-----------------------------------------|
| U0 – Resuscitation    | Loss of vital functions                   | Immediately                        | Ambulance                               |
| U1 – Life threatening | Unstable vital functions                  | Within 15 minutes                  | Ambulance                               |
| U2 – Emergent         | Vital functions in danger or organ damage | As soon as possible, within 1 hour | Home visit by GP or appointment at OHS- |

|                 |                                           |                            |                                                  |
|-----------------|-------------------------------------------|----------------------------|--------------------------------------------------|
|                 |                                           |                            | PC                                               |
| U3 – Urgent     | Possible risk of damage,<br>human reasons | A few hours (<3<br>hours)  | Home visit by GP or<br>appointment at OHS-<br>PC |
| U4 – Non-urgent | Marginal risk of damage                   | 24 hours                   | Appointment at OHS-<br>PC or telephone<br>advice |
| U5 – Advice     | No risk of damage                         | Advice, no time<br>related | Telephone advice                                 |

The aim of the NTS is to guarantee both efficient and safe care. Questions have been raised, however, about the current efficiency.<sup>(4)</sup> A national report showed an increase in high urgency allocations after the implementation of the NTS at the Dutch OHS-PC, notably U2 urgencies. (10) This is in contrast to the unchanged distribution of diseases, and suggests an increase of a more defensive triage strategy. In addition, a survey in 2016 among GPs revealed that the large majority (83.9%) believed that telephone triage with NTS resulted in (i) many unnecessary consultations and home visits in patients with non-urgent problems, and (ii) a high workload at the OHS-PC. (11) The authors of this survey speculated that overconsumption of care at the OHS-PC was attributable to certain characteristics of the users of the NTS. (11) More insight in the users of the NTS (triage nurse) could help improve the system. Yet, it is currently unknown how triage nurses actually use the NTS in their clinical reasoning process and how this affects the performance of the triage system. Also, media coverage of (fatal) adverse events has grown, and adverse event reports and investigation by the Dutch Health and Youth Care Inspectorate have been made publically available. (12) The increasing attention for (fatal) adverse events might possibly be related to more defensive triage to avoid such (fatal) adverse events, which could potentially worsen efficiency. Thus, thorough research on the accuracy and use of the NTS is needed in order to assess whether improvements in the balance between efficiency and safety are required.

1  
2  
3 Callers with symptoms suggestive of acute cardiovascular diseases, e.g. acute coronary  
4 syndrome (ACS), or transient ischemic attack (TIA)/stroke generally receive high urgency  
5 allocations. (13) Chest pain is the most common reason for dispatching an ambulance (U1) with  
6 60.7% of all ambulance rides deployed from the OHS-PC. (14) However, the incidence of ACS  
7 among patients experiencing chest discomfort in the Dutch primary care setting and referred to  
8 the hospital is low with around 10%. (15-17) The trade-off between efficiency and patient  
9 safety of telephone triage is particularly challenging in these cases. On the one hand, prompt  
10 detection of ACS or TIA/stroke is crucial to initiate interventions as early as possible and  
11 prevent myocardial or brain necrosis, and improve prognosis. (18-20) On the other hand,  
12 overestimation of urgency results in unnecessary high workload, high referral rates, high costs,  
13 and potentially in iatrogenic damage of the caller. The discussion about balancing efficiency and  
14 safety is especially complicated because missing an acute myocardial infarction is the most  
15 common reason for malpractice claims worldwide. (21-23)

16  
17  
18  
19  
20  
21  
22  
23  
24  
25  
26  
27  
28 Our ultimate goal is to improve the efficiency and safety of the triage of callers with symptoms  
29 suggestive of ACS or TIA/stroke who contact the OHS-PC, and to improve diagnosis. In the  
30 Safety First study we will evaluate real-life telephone triage recordings with corresponding  
31 urgency allocations, and patients' final clinical outcomes. Our research questions are (i) what is  
32 the diagnostic accuracy of the urgency allocation in callers with symptoms suggestive of ACS or  
33 TIA/stroke, (ii) which (clinical) determinants are predictive of an ACS or TIA/stroke diagnosis,  
34 and (iii) how is the NTS triage system used and how can it be improved in view of balancing  
35 efficiency and safety.  
36  
37  
38  
39  
40  
41  
42  
43  
44  
45  
46  
47  
48  
49  
50  
51  
52  
53  
54  
55  
56  
57  
58  
59  
60

## Methods and analysis

### Design

An observational study in which telephone triage recordings from nine OHS-PC will be evaluated against the clinical outcomes. The researchers will listen to 3,000 real-life recordings, and collect information on the medical history (e.g. history of heart failure, hypertension, ACS, TIA/stroke, diabetes, etc.), caller and symptom characteristics (e.g. onset, duration and severity of symptom(s), additional symptoms (e.g. transpiration, nausea, vomiting, pale skin), pain score in case of chest discomfort, etc.) discussed between the caller and triage nurse during the telephone triage conversations. We will also collect call characteristics (i.e. time of calling, duration of the call, and who calls) and triage information such as the urgency allocation, available from the registered notes of the OHS-PC (i.e. notes from both triage nurses and the supervising GP). All information will be collected on an electronic case record form. Because there is no national Dutch database containing information about diagnoses, we will ask the callers' own GPs to provide the final diagnosis related to the OHS-PC contact, which is based on the patient's medical record, and includes medical specialist's and hospital discharge letters.

### Setting

The foundation 'Primair Huisartsenposten' is a collaboration of six different OHS-PC locations in the central part of the Netherlands that provides out-of-hours primary care for approximately 1,5 million residents. It is one of the largest OHS-PC collaborations in the Netherlands and it covers both rural and urban areas. Every OHS-PC location has its own telephone triage centre.

### Data collection

All telephone calls are routinely recorded and archived for training, quality control, and research purposes in a computer program called 'Callmanager' (i.e. electronic patient record of the OHS-PC). Archiving is based on the International Classification of Primary Care (ICPC) code. (24) ICPC codes allow for classification of symptoms and diagnoses in the electronic patient records. The standardisation of the coding facilitates (inter)national comparison of primary care



1  
2  
3 diagnoses. At Dutch OHS-PC both triage nurses and GPs assign ICPC codes to patient contacts  
4 manually.  
5

6  
7 The study sample will be derived retrospectively from all triage recordings in the years 2014 to  
8 2016 and will contain calls linked to the ICPC codes reflecting our study domain: symptoms  
9 suggestive of ACS (i.e. K01, K02, K03, K24, K74, K75, K76, K77, K93, L04, P74, R02, R98) and  
10 symptoms suggestive of TIA/stroke (i.e. K89, K90, N17, N18, N19, N29, N89, N91). The  
11 distribution of sampling of ICPC codes within our study was based on the actual distribution of  
12 ICPC codes at the OHS-PC in 2014, and thus best reflects current practice. Per ICPC code a  
13 random sample will be taken.  
14  
15  
16  
17  
18  
19  
20

### 21 Inclusion and exclusion criteria

22  
23

24 Telephone triage recordings of callers of the OHS-PC with complaints that lead to suspicion of  
25 ACS or TIA/stroke will be included. The selection of recordings is based on (i) specific ICPC codes  
26 and (ii) a selection of keywords used in Callmanager (figure 1). As the specific ICPC codes may  
27 not cover all eligible callers due to inter-rater variability as a result of ICPC coding by different  
28 triage nurses and GPs (25, 26), we choose to select cases not only on ICPC codes, but also on  
29 keywords in the free text, in order to include a broad but nevertheless clinically realistic' range  
30 of patients with possibly typical and less typical symptoms that could be considered to be  
31 caused by underlying ACS or TIA/stroke. A major exclusion criterion is other recordings than  
32 triage conversations, e.g. calls between colleagues. All exclusion criteria are displayed in table  
33  
34  
35  
36  
37  
38  
39  
40  
41  
42  
43  
44  
45  
46  
47  
48  
49  
50  
51  
52  
53  
54  
55  
56  
57  
58  
59  
60

**Table 2. Inclusion and exclusion criteria for participation in the Safety First study**

| Inclusion criteria                                                                                                                                                                                                                                                                                                                                                                                                                                                                                                                                                                                                                                                                                                                                                                                             | Exclusion criteria                                                                                                                                                                                                                                                                                                                                                                           |
|----------------------------------------------------------------------------------------------------------------------------------------------------------------------------------------------------------------------------------------------------------------------------------------------------------------------------------------------------------------------------------------------------------------------------------------------------------------------------------------------------------------------------------------------------------------------------------------------------------------------------------------------------------------------------------------------------------------------------------------------------------------------------------------------------------------|----------------------------------------------------------------------------------------------------------------------------------------------------------------------------------------------------------------------------------------------------------------------------------------------------------------------------------------------------------------------------------------------|
| <ul style="list-style-type: none"> <li>Recordings of triage conversations of callers with symptoms suggestive of ACS based on (i) the following ICPC codes in 'Callmanager': K01, K02, K03, K24, K74, K75, K76, K77, K93, L04, P74, R02, R98; and (ii) key word selection: thoracic pain, chest pain, myocardial infarction, heart attack and their common abbreviations.</li> <li>Recordings of triage conversations of callers with symptoms suggestive of TIA or stroke based on (i) the following ICPC codes in 'Callmanager': K89, K90, N17, N18, N19, N29, N89, N91; and (ii) key word selection: TIA, stroke, cerebral or brain bleeding or haemorrhage or infarction, neurological deficit, arm or leg weakness, face or mouth drooping, speech or visual problems or sensory disturbances.</li> </ul> | <ul style="list-style-type: none"> <li>No triage conversation, but consultation between colleagues or questions about medication use</li> <li>Poor quality recordings</li> <li>Callers younger than 18 years</li> <li>Callers not living in the catchment area of the OHS-PC</li> <li>Callers enlisted with a GP who refused to provide information on the final clinical outcome</li> </ul> |

**Figure 1. Flowchart of the Safety First study**Data analysis

(i) The diagnostic accuracy of the urgency allocation on two separate outcomes: ACS, or TIA/stroke, will be calculated in terms of sensitivity, specificity, positive and negative predictive values. In addition, we will perform sensitivity analyses; a) also considering other emergency cases with chest discomfort, e.g. pulmonary embolism, acute heart failure, and thoracic aortic dissection, or in the domain symptoms suggestive of TIA/stroke; b) other emergency cases with neurological symptoms, e.g. subarachnoidal haemorrhage (SAH), epilepsy.

1  
2  
3 (ii) Multivariable logistic regression analysis will be applied to identify history items or caller  
4 characteristics that independently predict either ACS or TIA/stroke. In addition, multivariable  
5 models will be developed that predict the presence of respectively ACS, or TIA/stroke, and the  
6 C-statistic with the 95% confidence interval will be calculated after bootstrapping to correct for  
7 over-optimism. (27) Before multivariable analysis, multiple imputation techniques will be  
8 applied for missing values. Variables with more than 50% missings will not be considered.  
9 Variable selection will be based on literature review (known diagnostic predictors in both  
10 domains) and on univariable analysis (inclusion of variables with  $p < 0.15$ ). Special attention will  
11 be paid to gender and age, either as interaction term or by calculating gender and/or age-  
12 specific prediction models. All data analyses will be performed using SPSS statistical software  
13 program version 25.0.  
14  
15  
16  
17  
18  
19  
20  
21  
22

#### 23 24 Blinding of researchers

25  
26  
27 All researchers listening to the recordings, and filling out the electronic case record forms or  
28 who are otherwise involved in the Safety First study, e.g. the expert panel of one of our  
29 additional studies, will be blinded to the callers' clinical outcomes.  
30  
31  
32  
33

#### 34 Power calculation

35  
36  
37 For the power calculation we used the recommendations that apply to diagnostic studies. (21)  
38 Records of 2014-2016 were used and after application of the exclusion criteria two random  
39 samples of 2,000 recordings with 'symptoms suggestive of ACS' and 1,000 recordings with  
40 'symptoms suggestive of TIA/stroke' will be drawn. A prior pilot study showed that 1 out of 9  
41 callers symptoms suggestive of ACS is, after diagnostic work-up, diagnosed with ACS and 1 out  
42 of 2 callers symptoms suggestive for TIA-stroke is diagnosed with TIA or stroke. Based on  
43 Harrell's rule of thumb, for ACS 2,000 audio-tapes allow for the analysis of 22 variables and for  
44 TIA-stroke 1,000 audio tapes allow for the analysis of 50 diagnostic items. (28)  
45  
46  
47  
48  
49  
50  
51  
52  
53  
54  
55  
56  
57  
58  
59  
60

## Additional studies

As part of the Safety First study, three additional but smaller studies will be carried out designed to further expand the knowledge about the triage process at OHS-PC.

### (i) A case-control study on calamities

A calamity is defined as an adverse event with serious permanent patient harm or death as a consequence. (29) By Dutch law, root cause analysis (RCA) of every single calamity is required. RCA often points at flaws in the triage process as root causes for such calamities (30), resulting in an array of improvement measures for daily practice. However, it is unknown whether cases that result in a calamity really differ from those not evolving into a calamity, as all only have been evaluated as individual cases by experts knowing they evaluated a calamity and their assessment is thus prone to hindsight bias. (31, 32) In the OHS-PC setting calamities are very rare (0.006%) and the majority is of cardiovascular origin, e.g. missed acute myocardial infarction (AMI). (30) The aim of this additional study is to provide a more thorough view on missed or too late diagnosed AMIs that resulted in calamities by comparing these cases with matched controls in the domain of callers with chest pain, either due to ACS or not. The main question is whether the calamity cases actually differ from controls with respect to call and patient characteristics. For this additional study we will collect new data (calamity cases) and use data from the larger observational study described earlier for sampling our controls. Archived triage conversations from the period January 2013 – December 2017 of the calamity cases (defined as a missed diagnosis of AMI) will be compared with triage conversations of controls not meeting the calamity definition but also contacting the OHS-PC with symptoms suggestive of ACS. Per calamity case 8 controls will be matched to the case according to age, gender and symptom presentation. A researcher blinded to the outcome will extract information regarding call characteristics, caller characteristics and urgency allocation, and will insert all data in a database. An expert panel of experienced GPs blinded to the final outcome (calamity or no calamity), thus without case specific hindsight bias, will evaluate the triage conversations and the diagnostic accuracy (sensitivity, specificity, predictive values) of safe

1  
2  
3 triage handling according to the expert panel will be calculated against the final outcome  
4 (calamity or no calamity).  
5  
6

#### 8 (ii) Conversation analysis study 9

10  
11 In this additional study we will assess how conversation aspects may affect the urgency  
12 allocation during telephone triage. The ways in which obligatory NTS questions and other  
13 questions are formulated by the triage nurse (i.e. suggestive questions), and responded to by  
14 the conversation partner may provide more thorough insight into question-answer sequences  
15 at the OHS-PC that can be helpful to improve the (use of) the NTS. We will transcribe a sample  
16 of the case-control study triage conversations according to the Jefferson conventions, and the  
17 transcripts will be qualitatively analysed with established conversation analysis techniques. (33-  
18 35) We will specifically focus on either/or questions and their various formats (e.g. two-choice,  
19 multiple choice, open-ended or tag format) in the urgency decision phase of the triage calls.  
20  
21  
22  
23  
24  
25  
26  
27

#### 28 (iii) Interview study with triage nurses 29

30  
31 Finally, we will perform a qualitative interview study of triage nurses with the aim to gain more  
32 knowledge on triage nurses' reasoning during telephone triage of callers with symptoms  
33 suggestive of ACS or TIA/stroke, and how they use the NTS for decision making in these two  
34 domains. We will conduct semi-structured audio-stimulated recall interviews. (36) Per interview  
35 one or two recordings from a recent shift at the OHS-PC will be used to stimulate triage nurses'  
36 reflections. The interviews will be transcribed and the transcripts will be qualitatively analysed  
37 according to the principles of the grounded theory approach. (37)  
38  
39  
40  
41  
42  
43  
44  
45

#### 46 **Patient and public involvement** 47

48  
49 Patients were not directly involved in the design of this study, but representatives participate in  
50 the stakeholders meetings every 6 months together with other representatives, i.e. of the local  
51 and national OHS-PC organization and the Dutch Health and Youth Care Inspectorate. They  
52 provide crucial input that helps us with formulating additional, clinically relevant research  
53 questions.  
54  
55  
56  
57  
58  
59  
60

### **Ethics and dissemination**

The Medical Ethics Committee of the University Medical Centre Utrecht, the Netherlands endorsed this study (National Trial Register (NTR) identification number: NTR7331). All personal data, as well as all research data were stored anonymized according to the European General Data Protection Regulation. Data collection started in January 2016 and will last until December 2020. Communications and publications on the results will not enable identification of individual callers. Results will be disseminated to relevant primary care communities in peer-reviewed journals, and at scientific conferences. In addition, this research project will also result in two PhD theses.

## Discussion

The Safety First study will provide diagnostic accuracy data on ACS and TIA/stroke in the primary care setting. The efficiency and safety of the NTS in the out-of-hours primary care setting will be evaluated for callers with symptoms suggestive of ACS or TIA/stroke. In a case-control study we will explore calamities (missed acute myocardial infarctions) and assess whether they differ from controls (other patients with symptoms suggestive of ACS but not fulfilling the calamity criteria) with respect to call and patient characteristics. With qualitative studies we will generate more thorough knowledge on how triage nurses work and how the NTS is used.

### Efficiency and patient safety

A systematic review about patient safety in the OHS-PC setting concluded that 10% of all OHS-PC calls could be considered as 'unsafe'. (38) However, the claim of 'unsafe' calls was based on surrogate markers, and not on patients' clinical outcomes, and clearly contrasts with the very low incidence of calamities (0.006%). (30) By using the patients' final clinical outcomes as the reference, the Safety First study will address an important knowledge gap on diagnostic accuracy of telephone triage. In addition, our study will provide a more complete view on the patient safety of the NTS than can be achieved with root cause analysis of individual cases only, often resulting in the conclusion that the urgency level is underestimated. (30, 39) It is difficult to define when telephone triage at the OHS-PC is safe. Our case-control study will provide deeper knowledge on telephone conversations that resulted in calamities and their matched controls. This knowledge might put the general view on (i) analysing calamities, and (ii) the weight that is assigned to improvement measures in a different perspective.

### Users of the NTS

A questionnaire among Dutch GPs working at the OHS-PCs reported that a majority of GPs (83.9%) believe that nowadays telephone triage contributes to overconsumption of care at

1  
2  
3 OHS-PC. About 85% of responders consider this to be at least partly attributable to the level of  
4 experience and education, and the attitude and personality of the triage nurses. (11) As the  
5 performance of the NTS is inextricably linked to its users, we want to include conversation  
6 analysis and interview studies with triage nurses. The quality of telephone triage is highly  
7 dependent on the quality of communication between the triage nurse and the caller, and  
8 therefore the communication skills of triage nurses. (22, 40) Moreover, they have to deal with  
9 callers who greatly vary in their ability to communicate effectively and coherently. (41, 42)  
10 Additionally, the telephone triage is necessarily only based on oral information provided by the  
11 caller, lacking any visual cues or diagnostic information from physical examination. Our  
12 additional study on conversation analysis will add knowledge on the ways in which questions  
13 and answers are formulated by triage nurses and callers, and how this affects the triage  
14 conversation.

15  
16 Secondly, we will also focus on the obligatory question structure within the NTS, and how this  
17 affects the users. The NTS is a semi-automatic support system that is heavily dependent on the  
18 input of the triage nurses themselves; which 'main presenting problem' he/she chooses is  
19 based on the initial information from the caller, and each of the in total 57 'presenting  
20 problems' are linked to a separate algorithm of hierarchically organized, pre-specified  
21 questions. These questions need to be filled out before the NTS generates an urgency  
22 allocation. (43) Previous studies suggested that triage nurses may experience interactional  
23 dilemmas while working with a computer decision support. (44) Our interview study will  
24 provide more insight into triage nurses' clinical reasoning process during telephone triage, and  
25 how they use the NTS for decision making within the domains of callers with symptoms  
26 suggestive of ACS or TIA/stroke. This information can help improve the workability of NTS in  
27 daily practice. Furthermore, in these domains the knowledge that 'time is muscle' or 'time is  
28 brain' puts extra strain on the triage nurse, because unnecessary delays directly affect  
29 morbidity and mortality of patients who actually show to have ACS or TIA/stroke. (18, 19)  
30 Beside this stress factor, other factors such as shiftwork, fatigue, multitasking and understaffing  
31 can attribute to the risk of errors during the triage process. (22) In our interview study we want  
32  
33  
34  
35  
36  
37  
38  
39  
40  
41  
42  
43  
44  
45  
46  
47  
48  
49  
50  
51  
52  
53  
54  
55  
56  
57  
58  
59  
60



1  
2  
3 to include these risk factors, and their possible influence on the reasoning process of triage  
4 nurses.  
5  
6

## 7 8 **Conclusion** 9

10  
11 Our Safety First study will provide diagnostic accuracy data on ACS and TIA/stroke, and new  
12 insights on efficiency, patient safety and the use of the NTS by triage nurses during telephone  
13 triage of callers with symptoms suggestive of ACS or TIA/stroke at the OHS-PC. Results from our  
14 study will help to improve the telephone triage in these important domains and improve both  
15 efficiency and safety for callers.  
16  
17  
18  
19  
20  
21  
22  
23  
24  
25  
26  
27  
28  
29  
30  
31  
32  
33  
34  
35  
36  
37  
38  
39  
40  
41  
42  
43  
44  
45  
46  
47  
48  
49  
50  
51  
52  
53  
54  
55  
56  
57  
58  
59  
60

## List of abbreviations

ACS: Acute Coronary Syndrome; AMI: Acute Myocardial Infarction; ED: Emergency Department; TIA: Transient Ischemic Attack; GP: General Practitioner; NTS: Netherlands Triage Standard, OHS-PC: Out-Of-Hours Services in Primary Care.

## Author contributions

DLZ and FHR conceived the idea for the study and gained funding. DLZ, FHR, RAD, EDG and AWH designed the study. LTW and DCE prepared the manuscript and wrote the first draft, supervised by FHR. DLZ, FHR, RAD, EDG and AWH provided intellectual input and critically reviewed the manuscript. All authors read and approved the final manuscript.

## Funding statement

This work was supported by the department of general practice of the University Medical Centre Utrecht, Associate Professorship-promotion grant of D.L. Zwart, MD, PhD, the foundation 'Netherlands Triage Standard' and the foundation 'Stoffels-Hornstra'. The views expressed are those of the authors and not necessarily those of the foundations. This research was conducted without direct involvement from both funding foundations.

## Competing interests statement

The authors declare that they have no competing interests.

## Acknowledgements

The authors thank the OHS-PC foundation 'Primair Huisartsenposten' and all employees of the participating locations for their cooperation in this study, notably for providing data and technical support.

**Word count manuscript: 4331**

## References

1. Kuriyama A, Urushidani S, Nakayama T. Five-level emergency triage systems: variation in assessment of validity. *Emergency medicine journal : EMJ*. 2017;34(11):703-10.
2. Netherlands Triage Standard [cited 2018 June 22]. Available from: <http://de-nts.nl/>.
3. National guidelines for telephone triage and advice in Family Practice [cited 2018 June 22]. Available from: <https://www.nhg.org/winkel/producten/nhg-triagewijzer-versie-2016>.
4. Smits M, Rutten M, Keizer E, Wensing M, Westert G, Giesen P. The Development and Performance of After-Hours Primary Care in the Netherlands: A Narrative Review. *Annals of internal medicine*. 2017;166(10):737-42.
5. van Ierland Y, van Veen M, Huibers L, Giesen P, Moll HA. Validity of telephone and physical triage in emergency care: the Netherlands Triage System. *Family practice*. 2011;28(3):334-41.
6. Nishi F, de Oliveira Motta Maia F, de Souza Santos I, de Almeida Lopes Monteiro da Cruz D. Assessing sensitivity and specificity of the Manchester Triage System in the evaluation of acute coronary syndrome in adult patients in emergency care: a systematic review. *JBIC Database of Systematic Reviews and Implementation Reports*. 2017;15(6):1747-61.
7. Steiner D, Renetseder F, Kutz A, Haubitz S, Faessler L, Anderson JB, et al. Performance of the Manchester Triage System in Adult Medical Emergency Patients: A Prospective Cohort Study. *J Emerg Med*. 2016;50(4):678-89.
8. Lake R, Georgiou A, Li J, Li L, Byrne M, Robinson M, et al. The quality, safety and governance of telephone triage and advice services - an overview of evidence from systematic reviews. *BMC health services research*. 2017;17(1):614.
9. Blank L, Coster J, O'Cathain A, Knowles E, Tosh J, Turner J, et al. The appropriateness of, and compliance with, telephone triage decisions: a systematic review and narrative synthesis. *J Adv Nurs*. 2012;68(12):2610-21.
10. Jansen T, de Hoon S, Hek K, Verheij R. Developments at the out-of-hours services in primary care. Changes in care demand and health care issues in 2013-2015. [Ontwikkelingen op de huisartsenpost. Veranderingen in zorgvraag en gezondheidsproblemen in 2013-2015.]. NIVEL, 2017.
11. Keizer E, Maassen I, Smits M, Wensing M, Giesen P. Reducing the use of out-of-hours primary care services: A survey among Dutch general practitioners. *The European journal of general practice*. 2016;22(3):189-95.
12. Dutch Health and Youth Care Inspectorate, IGJ. Learning from incident reports in openness. Learn and improve, working together on further improvement of quality of care. [In openheid leren van meldingen. Leren en verbeteren, samen werken aan verdere verbetering van kwaliteit van zorg.]. Dutch Ministry of Health, Welfare and Sport; 2016.
13. Smits M, Verheij R. Changes in urgency of contacts with the out-of-hours services in primary care 2013-2016. [Veranderingen in de urgentie van contacten met de huisartsenpost 2013-2016.]. NIVEL, 2017.
14. Plat FM, Peters YAS, Loots FJ, de Groot CJA, Eckhardt T, Keizer E, et al. Ambulance dispatch versus general practitioner home visit for highly urgent out-of-hours primary care. *Family practice*. 2017(Dec 20).
15. Hoorweg BB, Willemsen RT, Cleef LE, Boogaerts T, Buntinx F, Glatz JF, et al. Frequency of chest pain in primary care, diagnostic tests performed and final diagnoses. *Heart*. 2017;103(21):1727-32.
16. Wibring K, Herlitz J, Christensson L, Lingman M, Bang A. Prehospital factors associated with an acute life-threatening condition in non-traumatic chest pain patients - A systematic review. *International journal of cardiology*. 2016;219:373-9.
17. Rawshani A, Larsson A, Gelang C, Lindqvist J, Gellerstedt M, Bang A, et al. Characteristics and outcome among patients who dial for the EMS due to chest pain. *International journal of cardiology*. 2014;176(3):859-65.

18. Bosner S, Haasenritter J, Becker A, Karatolios K, Vaucher P, Gencer B, et al. Ruling out coronary artery disease in primary care: development and validation of a simple prediction rule. *CMAJ : Canadian Medical Association journal = journal de l'Association medicale canadienne*. 2010;182(12):1295-300.
19. Berglund A, von Euler M, Schenck-Gustafsson K, Castren M, Bohm K. Identification of stroke during the emergency call: a descriptive study of callers' presentation of stroke. *BMJ open*. 2015;5(4):e007661.
20. Leathley MJ, Jones SP, Gibson JM, Ford GA, McAdam JJ, Quinn T, et al. "Can you send an ambulance please?": a comparison of callers' requests for emergency medical dispatch in non-stroke and stroke calls. *Emergency medicine journal : EMJ*. 2014;31(e1):e25-8.
21. Ernesater A, Winblad U, Engstrom M, Holmstrom IK. Malpractice claims regarding calls to Swedish telephone advice nursing: what went wrong and why? *J Telemed Telecare*. 2012;18(7):379-83.
22. Roing M, Holmstrom IK. Malpractice claims in Swedish telenursing: lessons learned from interviews with telenurses and managers. *Nurs Res*. 2015;64(1):35-43.
23. Katz HP, Kaltsounis D, Halloran L, Mondor M. Patient safety and telephone medicine : some lessons from closed claim case review. *J Gen Intern Med*. 2008;23(5):517-22.
24. The Dutch College of General Practitioners, NHG. The International Classification of Primary Care (ICPC). Version 6 (Dutch translation derived from ICPC-1 by the WONCA International Classification Committee). 2018. Available from: <https://www.nhg.org/themas/artikelen/icpc>.
25. Zwaanswijk M, Hek K. ICPC coding at the out-of-hours service in primary care [ICPC-codering op de huisartsenpost]. *Huisarts Wet*. 2013;56(11).
26. Rosendal M, Carlsen A, Rask M, Moth G. Symptoms as the main problem in primary care: A cross-sectional study of frequency and characteristics. *Scandinavian journal of primary health care*. 2015;33(2):91-9.
27. Efron BT, R. An introduction to the bootstrap. *Monographs on statistics and applied probability*. New York: Chapman & Hall; 1993.
28. Harrell FE, Jr., Lee KL, Califf RM, Pryor DB, Rosati RA. Regression modelling strategies for improved prognostic prediction. *Stat Med*. 1984;3(2):143-52.
29. Healthcare Quality, Complaints and Disputes Act (WKKKGZ), (2016).
30. Rutten MH, Kant J, Giesen P. What can we learn from calamities at out-of-hours services in primary care? [Wat kunnen we leren van calamiteiten op de huisartsenpost?]. *Huisarts Wet*. 2018;6(61).
31. Henriksen K, Kaplan H. Hindsight bias, outcome knowledge and adaptive learning. *Qual Saf Health Care*. 2003;12 Suppl 2:ii46-50.
32. Zwaan L, Monteiro S, Sherbino J, Ilgen J, Howey B, Norman G. Is bias in the eye of the beholder? A vignette study to assess recognition of cognitive biases in clinical case workups. *BMJ Qual Saf*. 2017;26(2):104-10.
33. Jefferson G. A technique for inviting laughter and its subsequent acceptance/declination. . In: Psathas G, editor. *Everyday language: Studies in ethnomethodology*. New York, London: Irvington; 1979. p. 79-96.
34. Jefferson G. On a failed hypothesis: conjunctionals as overlap-vulnerable. In: Brabant KU, editor. *Tilburg papers in language and literature*. Tilburg1983. p. 1-33.
35. Jefferson G. Notes on a possible metric which provides for a 'standard maximum' silence of approximately one second in conversation. In: Brabant KU, editor. *Tilburg papers in language and literature*. Tilburg1983. p. 1-83.
36. Dempsey N. Stimulated recall interviews in ethnography. *Qualitative sociology*. 2010;33(3):349-67.
37. Kolb SM. Grounded theory and the constant comparative method: valid research strategies for educators. *Journal of Emerging Trends in Educational Research and Policy Studies*. 2012;3:83-6.
38. Huibers L, Smits M, Renaud V, Giesen P, Wensing M. Safety of telephone triage in out-of-hours care: a systematic review. *Scandinavian journal of primary health care*. 2011;29(4):198-209.

- 1  
2  
3 39. Annual reports of 2014 and 2015. [Jaarverslagen 2014 en 2015.]. Utrecht, The Netherlands:  
4 Foundation Primair out-of-hours services in primary care [Stichting Primair Huisartsenposten]  
5 40. Holmstrom I. Decision aid software programs in telenursing: not used as intended? Experiences  
6 of Swedish telenurses. *Nurs Health Sci.* 2007;9(1):23-8.  
7 41. Pettinari CJ, Jessopp L. "Your ears become your eyes": managing the absence of visibility in  
8 NHS Direct. *J Adv Nurs.* 2001;36(5):668-75.  
9 42. Roing M, Rosenqvist U, Holmstrom IK. Threats to patient safety in telenursing as revealed in  
10 Swedish telenurses' reflections on their dialogues. *Scand J Caring Sci.* 2013;27(4):969-76.  
11 43. Smits M, Keizer E, Ram P, Giesen P. Development and testing of the KERNset: an instrument to  
12 assess the quality of telephone triage in out-of-hours primary care services. *BMC health services research.*  
13 2017;17(1):798.  
14 44. Murdoch J, Barnes R, Pooler J, Lattimer V, Fletcher E, Campbell JL. The impact of using  
15 computer decision-support software in primary care nurse-led telephone triage: interactional dilemmas  
16 and conversational consequences. *Soc Sci Med.* 2015;126:36-47.  
17  
18  
19  
20  
21  
22  
23  
24  
25  
26  
27  
28  
29  
30  
31  
32  
33  
34  
35  
36  
37  
38  
39  
40  
41  
42  
43  
44  
45  
46  
47  
48  
49  
50  
51  
52  
53  
54  
55  
56  
57  
58  
59  
60

9 OHS-PC in the vicinity of Utrecht  
1,2 million telephone conversations in the period 2014 to 2016

1  
2  
3

**1. Preselection of tapes ACS**

**Inclusion:**  
 8 Callmanager database  
 9 selection based on ICPC  
 10 codes: K01, K02, K03, K24,  
 11 K74, K75, K76, K77, K93, L04,  
 12 P74, R02, R98  
 13 Keyword selection: thoracic  
 14 pain, chest pain, myocardial  
 15 infarction, heart attack and  
 16 their common abbreviations

**Reasons for exclusion:**  
 19 Callers younger than 18 years  
 20 Callers not living in the  
 21 catchment area of the OHS-  
 22 PC  
 23 Callers enlisted with a GP  
 24 who refused to provide  
 25 information on the final  
 26 clinical outcome

**2. Selection after listening back to tapes**

**Reasons for exclusion:**  
 32 No triage conversation, but  
 33 consultation, e.g. between  
 34 colleagues or questions  
 35 about medication use  
 36 Poor quality recordings

37  
38  
39  
40  
41  
42  
43  
44  
45  
46  
47  
48  
49  
50  
51  
52  
53  
54  
55  
56

**1. Preselection of tapes TIA/stroke**

**Inclusion:**  
 • Callmanager database  
 selection based on ICPC codes:  
 K89, K90, N17, N18, N19, N29,  
 N89, N91  
 • Keyword selection: TIA, stroke,  
 cerebral or brain bleeding or  
 haemorrhage or infarction,  
 neurological deficit, arm or leg  
 weakness, face or mouth  
 drooping, speech or visual  
 problems or sensory  
 disturbances

**Reasons for exclusion:**  
 - Callers younger than 18 years  
 - Callers not living in the  
 catchment area of the OHS-PC  
 - Callers enlisted with a GP who  
 refused to provide information  
 on the final clinical outcome

**2. Selection after listening back to tapes**

**Reasons for exclusion:**  
 - No triage conversation, but  
 consultation, e.g. between  
 colleagues or questions about  
 medication use  
 - Poor quality recordings

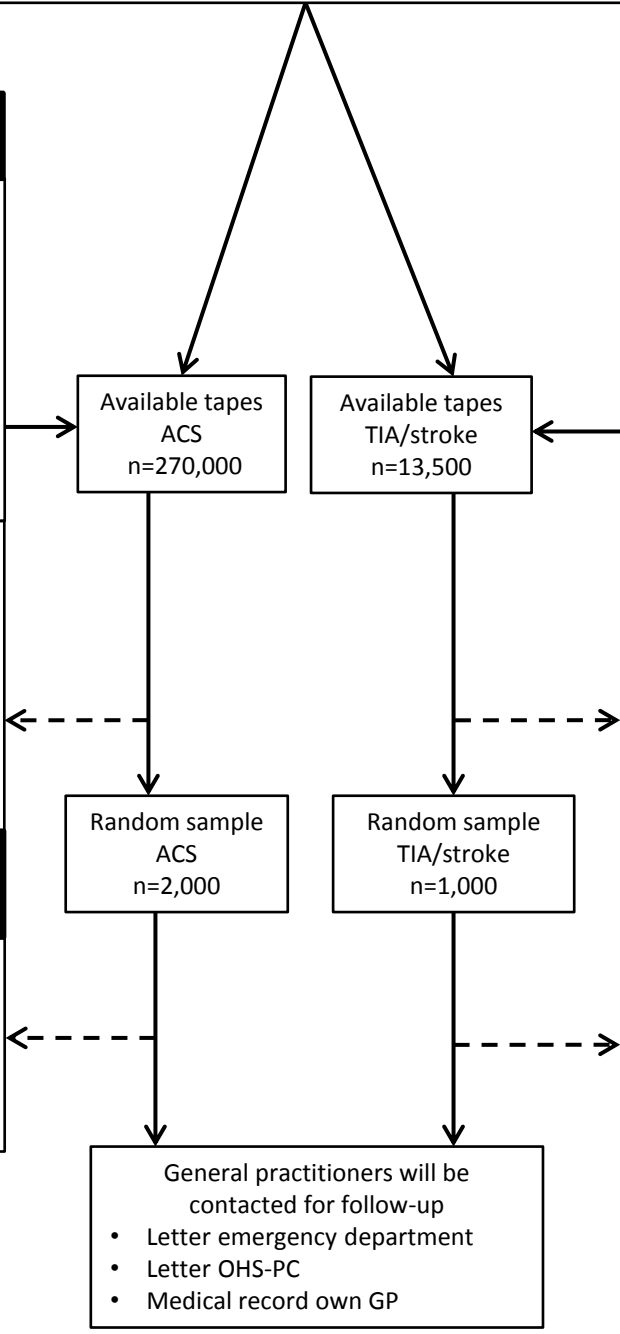

# BMJ Open

## Optimisation of telephone triage of callers with symptoms suggestive of acute cardiovascular disease in out of hours primary care: observational design of the Safety First study

|                                 |                                                                                                                                                                                                                                                                                                                                                                                                                                                                                                                                                                                                                                                                                                                                                                                                                                                                                                      |
|---------------------------------|------------------------------------------------------------------------------------------------------------------------------------------------------------------------------------------------------------------------------------------------------------------------------------------------------------------------------------------------------------------------------------------------------------------------------------------------------------------------------------------------------------------------------------------------------------------------------------------------------------------------------------------------------------------------------------------------------------------------------------------------------------------------------------------------------------------------------------------------------------------------------------------------------|
| Journal:                        | <i>BMJ Open</i>                                                                                                                                                                                                                                                                                                                                                                                                                                                                                                                                                                                                                                                                                                                                                                                                                                                                                      |
| Manuscript ID                   | bmjopen-2018-027477.R2                                                                                                                                                                                                                                                                                                                                                                                                                                                                                                                                                                                                                                                                                                                                                                                                                                                                               |
| Article Type:                   | Protocol                                                                                                                                                                                                                                                                                                                                                                                                                                                                                                                                                                                                                                                                                                                                                                                                                                                                                             |
| Date Submitted by the Author:   | 31-Mar-2019                                                                                                                                                                                                                                                                                                                                                                                                                                                                                                                                                                                                                                                                                                                                                                                                                                                                                          |
| Complete List of Authors:       | Erkelens, Daphne; University Medical Center Utrecht, Utrecht University, Julius Center for Health Sciences and Primary Care<br>Wouters, Loes; University Medical Center Utrecht, Utrecht University, Julius Center for Health Sciences and Primary Care<br>Zwart, D.L; University Medical Center Utrecht, Utrecht University, Julius Center for Health Sciences and Primary Care<br>Damoiseaux, Roger; University Medical Center Utrecht, Utrecht University, Julius Center for Health Sciences and Primary Care<br>De Groot, Esther; University Medical Center Utrecht, Utrecht University, Julius Center for Health Sciences and Primary Care<br>Hoes, Arno; University Medical Center Utrecht, Utrecht University, Julius Center for Health Sciences and Primary Care<br>Rutten, Frans; University Medical Center Utrecht, Utrecht University, Julius Center for Health Sciences and Primary Care |
| <b>Primary Subject Heading</b>: | Cardiovascular medicine                                                                                                                                                                                                                                                                                                                                                                                                                                                                                                                                                                                                                                                                                                                                                                                                                                                                              |
| Secondary Subject Heading:      | General practice / Family practice, Neurology                                                                                                                                                                                                                                                                                                                                                                                                                                                                                                                                                                                                                                                                                                                                                                                                                                                        |
| Keywords:                       | PRIMARY CARE, Stroke < NEUROLOGY, After hours care, Acute coronary syndrome, Transient ischemic attack, Telephone triage                                                                                                                                                                                                                                                                                                                                                                                                                                                                                                                                                                                                                                                                                                                                                                             |
|                                 |                                                                                                                                                                                                                                                                                                                                                                                                                                                                                                                                                                                                                                                                                                                                                                                                                                                                                                      |

SCHOLARONE™  
Manuscripts

1  
2  
3 **Optimisation of telephone triage of callers with symptoms suggestive of acute cardiovascular**  
4 **disease in out of hours primary care: observational design of the Safety First study**  
5  
6

7  
8 D.C. Erkelens<sup>1\*</sup>, L.T. Wouters<sup>1\*</sup>, D.L. Zwart<sup>1</sup>, R.A. Damoiseaux<sup>1</sup>, E. de Groot<sup>1</sup>, A.W. Hoes<sup>1</sup>, F.H.  
9 Rutten<sup>1</sup>  
10

11  
12  
13 \*Both authors contributed equally

14  
15 <sup>1</sup>Julius Centre for Health Sciences and Primary Care, Department of General Practice, University  
16 Medical Centre Utrecht, Utrecht University, Utrecht, The Netherlands.  
17  
18

19  
20  
21  
22 **Corresponding author:** D.C. Erkelens<sup>1</sup>, MD, PhD candidate, Julius Centre for Health Sciences and  
23 Primary Care, University Medical Centre Utrecht, Utrecht University. Address: STR 6.131, PO  
24 Box 85500, 3508 GA Utrecht, The Netherlands. Phone number: +31 (0)88 75 69289. Email:  
25 [D.C.A.Erkelens@umcutrecht.nl](mailto:D.C.A.Erkelens@umcutrecht.nl)  
26  
27  
28  
29  
30  
31

32  
33 The Netherlands National Trial Register identification number: NTR7331.  
34  
35  
36  
37  
38  
39  
40  
41  
42  
43  
44  
45  
46  
47  
48  
49  
50  
51  
52  
53  
54  
55  
56  
57  
58  
59  
60



## Abstract

**Introduction:** In the Netherlands, the “Netherlands Triage Standard” (NTS) is frequently used as digital decision support system for telephone triage at out-of-hours primary care services (OHS-PC). Aim of NTS is to guarantee accessible, efficient and safe care. However, there are indications that current triage is inefficient, with overestimation of urgency, notably in suspected acute cardiovascular disease. In addition, in primary care setting the NTS has only been validated against surrogate markers, and diagnostic accuracy with clinical outcomes as the reference is unknown. In the Safety First study, we address this gap in knowledge by describing, understanding and improving the diagnostic process and urgency allocation in callers with symptoms suggestive of acute cardiovascular disease, in order to improve both efficiency and safety of telephone triage in this domain.

**Methods and analysis:** An observational study in which 3,000 telephone triage recordings (period 2014-2016) will be analysed. Information is collected from the recordings including caller- and symptom characteristics and urgency allocation. The callers' own general practitioners are contacted for the final diagnosis of each contact. We included recordings of callers with symptoms suggestive of acute coronary syndrome (ACS) or transient ischemic attack (TIA)/stroke. With univariable and multivariable logistic regression analyses the diagnostic accuracy of caller- and symptom characteristics will be analysed in terms of predictive values with urgency level, and ACS and TIA/stroke as outcomes, respectively. To further improve our understanding of the triage process at OHS-PC, we will carry out additional studies applying both quantitative and qualitative methods; (i) case-control study on calamities, (ii) conversation analysis study, and (iii) interview study with triage nurses.

**Ethics and dissemination:** The Medical Ethics Committee of the University Medical Centre Utrecht, the Netherlands endorsed this study (National Trial Register identification: NTR7331). Results will be disseminated at scientific conferences, regional educational sessions, and publication in peer-reviewed journals.

**Word count abstract: 300**

1  
2  
3 **Keywords:** Telephone triage, Netherlands Triage Standard, out of hours services in primary  
4 care, after hours care, acute coronary syndrome, transient ischemic attack, stroke.  
5  
6  
7

8 **Strengths and limitations of this study**  
9

- 10  
11 • We will assess the accuracy of the telephone triage in the OHS-PC setting in the domain of  
12 patients with symptoms suggestive of acute cardiovascular disease.  
13  
14 • We will apply the actual clinical outcome as the reference, not just 'expert opinion'.  
15  
16 • New insights retrieved by our 'holistic approach' will help improve both patient safety and  
17 efficiency.  
18  
19 • Use of routine care data and therefore missing data on some variables of interest.  
20  
21 • Routine care diagnoses and therefore the risk of missing some cases with an unrecognized  
22 acute cardiovascular disease.  
23  
24  
25  
26  
27  
28  
29  
30  
31  
32  
33  
34  
35  
36  
37  
38  
39  
40  
41  
42  
43  
44  
45  
46  
47  
48  
49  
50  
51  
52  
53  
54  
55  
56  
57  
58  
59  
60

## Introduction

Digital decision support systems for telephone triage are widely used, also in primary care out of hours settings. For these settings, telephone triage systems were derived from triage systems applied in emergency department (ED) settings. An important difference, however, is that telephone triage systems do not include items related to face-to-face contact and physical examination. (1) In the Netherlands, a digital decision support system for telephone triage called the “Netherlands Triage Standard” (NTS) was introduced in 2011. (2) The NTS was constructed by an expert panel using (i) the Dutch national telephone guidelines for office hours in family practice (‘NHG triage index’) and (ii) a modified version of the Manchester Triage System (MTS) developed in the ED setting. (3) Since its introduction in 2011, the NTS has been used by most out-of-hours services in primary care (OHS-PC), and by approximately half of the ambulance dispatch centres in the Netherlands. (4) An important argument for using the same system within the ‘critical care chain’ was that it would facilitate communication during care transitions, and potentially improve transitional safety. (5)

Many studies assessed the diagnostic accuracy of triage systems in the ED setting. (6-9) Yet, comparable studies on validity of telephone triage systems in primary care settings are limited. (5) The validity of the five-level triage system for physical triage in the ED setting was evaluated in a systematic review of 57 studies. (1) Various reference standards for the assessment of validity were used; researchers’ own creation of a reference standard or combining severity with resource measures, e.g. hospital admissions. (1) Only one of the included studies in this review assessed the validity of the NTS, for both physical triage in the ED and for telephone triage in the OHS-PC. (5) For the assessment of telephone triage in OHS-PC, 6,668 patients were evaluated. Referrals to the ED and self-care advices were the two surrogate markers used as best proxies for adequate urgency allocation. Consequently, patients referred to the ED were considered as being correctly labelled as high urgency and those receiving a self-care advice as correctly low urgency, independent of the final diagnosis related to the episode. Not surprisingly, the researchers found an association between high urgencies and ED referrals and between low urgency level allocation by the triage nurse and self-care advices. Information on

whether the urgency allocation was in line with the clinical outcomes is lacking. (5) There are no other studies available that assessed the validity of the NTS for telephone triage in the OHS-PC setting or validated the NTS to the final diagnosis instead of to surrogate markers. (5, 10) Our study addresses this current knowledge gap.

Over the last decade, out of hours primary care in the Netherlands has been reorganised from small practices into larger OHS-PC. (4) Patients primarily contact the OHS-PC when they need medical help outside office hours. In case of life-threatening symptoms, however, patients can also directly contact the emergency number of the ambulance dispatch centres or directly visit the ED. At the OHS-PC, triage nurses trained in using the NTS handle all incoming calls, under supervision of a general practitioner (GP). (4) The goal of this telephone triage is to identify callers with the most urgent need of care. (11) With urgent clinical situations in mind the experts formulated the NTS questions in a hierarchically ordered algorithm; questions focusing on the symptoms and circumstances considered most critical first, followed by questions about less critical symptoms. (2) The triage nurse fills out the caller's responses in the semi-automatic NTS system, which then automatically generates urgency allocations. Within the NTS six possible urgency levels can be distinguished that are linked to the response time within which a caller should receive medical help (see table 1). The urgency level generated by the NTS can be adjusted by the triage nurse if the nurse disagrees with the NTS allocation (upgrading or downgrading). (11) Most often such adjustments are preceded by consultation of the supervising GP, who has the final responsibility for the urgency level allocation.

**Table 1. NTS levels of urgency (2, 5)**

| NTS Urgency level     | Definition                                | Response time                      | Medical help                            |
|-----------------------|-------------------------------------------|------------------------------------|-----------------------------------------|
| U0 – Resuscitation    | Loss of vital functions                   | Immediately                        | Ambulance                               |
| U1 – Life threatening | Unstable vital functions                  | Within 15 minutes                  | Ambulance                               |
| U2 – Emergent         | Vital functions in danger or organ damage | As soon as possible, within 1 hour | Home visit by GP or appointment at OHS- |

|                 |                                           |                            |                                                  |
|-----------------|-------------------------------------------|----------------------------|--------------------------------------------------|
|                 |                                           |                            | PC                                               |
| U3 – Urgent     | Possible risk of damage,<br>human reasons | A few hours (<3<br>hours)  | Home visit by GP or<br>appointment at OHS-<br>PC |
| U4 – Non-urgent | Marginal risk of damage                   | 24 hours                   | Appointment at OHS-<br>PC or telephone<br>advice |
| U5 – Advice     | No risk of damage                         | Advice, no time<br>related | Telephone advice                                 |

The aim of the NTS is to guarantee both efficient and safe care. Questions have been raised, however, about the current efficiency.<sup>(4)</sup> A national report showed an increase in high urgency allocations after the implementation of the NTS at the Dutch OHS-PC, notably U2 urgencies. (12) This is in contrast to the unchanged distribution of diseases, and suggests an increase of a more defensive triage strategy. In addition, a survey in 2016 among GPs revealed that the large majority (83.9%) believed that telephone triage with NTS resulted in (i) many unnecessary consultations and home visits in patients with non-urgent problems, and (ii) a high workload at the OHS-PC. (13) The authors of this survey speculated that overconsumption of care at the OHS-PC was attributable to certain characteristics of the users of the NTS. (11) Previous studies on OHS-PC telephone triage in the United Kingdom described that the clinical background of triage nurses, the range of their experience, their gender and their attitudes to risk did not affect the triage decisions made. (14, 15) More insight in the users of the NTS (triage nurse) could help improve the system. Yet, it is currently unknown how triage nurses actually use the NTS in their clinical reasoning process and how this affects the performance of the triage system. Also, media coverage of (fatal) adverse events has grown, and adverse event reports and investigation by the Dutch Health and Youth Care Inspectorate have been made publically available. (16) The increasing attention for (fatal) adverse events might possibly be related to more defensive triage to avoid such (fatal) adverse events, which could potentially worsen efficiency. Thus, thorough research on the accuracy and use of the NTS is needed in order to assess whether improvements in the balance between efficiency and safety are required.

1  
2  
3 Callers with symptoms suggestive of acute cardiovascular diseases, e.g. acute coronary  
4 syndrome (ACS), or transient ischemic attack (TIA)/stroke generally receive high urgency  
5 allocations. (17) Chest pain is the most common reason for dispatching an ambulance (U1) with  
6 60.7% of all ambulance rides deployed from the OHS-PC. (18) However, the incidence of ACS  
7 among patients experiencing chest discomfort in the Dutch primary care setting and referred to  
8 the hospital is low with around 10%. (19-21) The trade-off between efficiency and patient  
9 safety of telephone triage is particularly challenging in these cases. On the one hand, prompt  
10 detection of ACS or TIA/stroke is crucial to initiate interventions as early as possible and  
11 prevent myocardial or brain necrosis, and improve prognosis. (22-24) On the other hand,  
12 overestimation of urgency results in unnecessary high workload, high referral rates, high costs,  
13 and potentially in iatrogenic damage of the caller. (25) The discussion about balancing  
14 efficiency and safety is especially complicated because missing an acute myocardial infarction is  
15 the most common reason for malpractice claims worldwide. (26-28)

16  
17  
18  
19  
20  
21  
22  
23  
24  
25  
26  
27  
28 Our ultimate goal is to improve the efficiency and safety of the triage of callers with symptoms  
29 suggestive of ACS or TIA/stroke who contact the OHS-PC, and to improve diagnosis. In the  
30 Safety First study we will evaluate real-life telephone triage recordings with corresponding  
31 urgency allocations, and patients' final clinical outcomes. Our research questions are (i) what is  
32 the diagnostic accuracy of the urgency allocation in callers with symptoms suggestive of ACS or  
33 TIA/stroke, (ii) which (clinical) determinants are predictive of an ACS or TIA/stroke diagnosis,  
34 and (iii) how is the NTS triage system used and how can it be improved in view of balancing  
35 efficiency and safety.  
36  
37  
38  
39  
40  
41  
42  
43  
44  
45  
46  
47  
48  
49  
50  
51  
52  
53  
54  
55  
56  
57  
58  
59  
60

## Methods and analysis

### Design

An observational study in which telephone triage recordings from nine OHS-PC will be evaluated against the clinical outcomes. The researchers will listen to 3,000 real-life recordings, and collect information on the medical history (e.g. history of heart failure, hypertension, ACS, TIA/stroke, diabetes, etc.), caller and symptom characteristics (e.g. onset, duration and severity of symptom(s), additional symptoms (e.g. transpiration, nausea, vomiting, pale skin), pain score in case of chest discomfort, etc.) discussed between the caller and triage nurse during the telephone triage conversations. We will also collect call characteristics (i.e. time of calling, duration of the call, and who calls) and triage information such as the urgency allocation, available from the registered notes of the OHS-PC (i.e. notes from both triage nurses and the supervising GP). All information will be collected on an electronic case record form. Because there is no national Dutch database containing information about diagnoses, we will ask the callers' own GPs to provide the final diagnosis related to the OHS-PC contact, which is based on the patient's medical record, and includes medical specialist's and hospital discharge letters.

### Setting

The foundation 'Primair Huisartsenposten' is a collaboration of six different OHS-PC locations in the central part of the Netherlands that provides out-of-hours primary care for approximately 1,5 million residents. It is one of the largest OHS-PC collaborations in the Netherlands and it covers both rural and urban areas. Every OHS-PC location has its own telephone triage centre.

### Data collection

All telephone calls are routinely recorded and archived for training, quality control, and research purposes in a computer program called 'Callmanager' (i.e. electronic patient record of the OHS-PC). Archiving is based on the International Classification of Primary Care (ICPC) code. (29) ICPC codes allow for classification of symptoms and diagnoses in the electronic patient records. The standardisation of the coding facilitates (inter)national comparison of primary care

1  
2  
3 diagnoses. At Dutch OHS-PC both triage nurses and GPs assign ICPC codes to patient contacts  
4 manually. The study sample will be derived retrospectively from all triage recordings in the  
5 years 2014 to 2016 and will contain calls linked to the ICPC codes reflecting our study domain:  
6 symptoms suggestive of ACS (i.e. K01, K02, K03, K24, K74, K75, K76, K77, K93, L04, P74, R02,  
7 R98) and symptoms suggestive of TIA/stroke (i.e. K89, K90, N17, N18, N19, N29, N89, N91). The  
8 distribution of sampling of ICPC codes within our study was based on the actual distribution of  
9 ICPC codes at the OHS-PC in 2014, and thus best reflects current practice. Per ICPC code a  
10 random sample will be taken.  
11  
12  
13  
14  
15  
16  
17  
18

### 19 Inclusion and exclusion criteria

20  
21  
22 Telephone triage recordings of callers of the OHS-PC with complaints that lead to suspicion of  
23 ACS or TIA/stroke will be included. The selection of recordings is based on (i) specific ICPC codes  
24 and (ii) a selection of keywords used in Callmanager (figure 1). As the specific ICPC codes may  
25 not cover all eligible callers due to inter-rater variability as a result of ICPC coding by different  
26 triage nurses and GPs (30, 31), we choose to select cases not only on ICPC codes, but also on  
27 keywords in the free text, in order to include a broad but nevertheless clinically realistic' range  
28 of patients with possibly typical and less typical symptoms that could be considered to be  
29 caused by underlying ACS or TIA/stroke. A major exclusion criterion is other recordings than  
30 triage conversations, e.g. calls between colleagues. All exclusion criteria are displayed in table  
31  
32  
33  
34  
35  
36  
37  
38  
39  
40  
41  
42  
43  
44  
45  
46  
47  
48  
49  
50  
51  
52  
53  
54  
55  
56  
57  
58  
59  
60

2.



**Table 2. Inclusion and exclusion criteria for participation in the Safety First study**

| Inclusion criteria                                                                                                                                                                                                                                                                                                                                                                                                                                                                                                                                                                                                                                                                                                                                                                                             | Exclusion criteria                                                                                                                                                                                                                                                                                                                                                                           |
|----------------------------------------------------------------------------------------------------------------------------------------------------------------------------------------------------------------------------------------------------------------------------------------------------------------------------------------------------------------------------------------------------------------------------------------------------------------------------------------------------------------------------------------------------------------------------------------------------------------------------------------------------------------------------------------------------------------------------------------------------------------------------------------------------------------|----------------------------------------------------------------------------------------------------------------------------------------------------------------------------------------------------------------------------------------------------------------------------------------------------------------------------------------------------------------------------------------------|
| <ul style="list-style-type: none"> <li>Recordings of triage conversations of callers with symptoms suggestive of ACS based on (i) the following ICPC codes in 'Callmanager': K01, K02, K03, K24, K74, K75, K76, K77, K93, L04, P74, R02, R98; and (ii) key word selection: thoracic pain, chest pain, myocardial infarction, heart attack and their common abbreviations.</li> <li>Recordings of triage conversations of callers with symptoms suggestive of TIA or stroke based on (i) the following ICPC codes in 'Callmanager': K89, K90, N17, N18, N19, N29, N89, N91; and (ii) key word selection: TIA, stroke, cerebral or brain bleeding or haemorrhage or infarction, neurological deficit, arm or leg weakness, face or mouth drooping, speech or visual problems or sensory disturbances.</li> </ul> | <ul style="list-style-type: none"> <li>No triage conversation, but consultation between colleagues or questions about medication use</li> <li>Poor quality recordings</li> <li>Callers younger than 18 years</li> <li>Callers not living in the catchment area of the OHS-PC</li> <li>Callers enlisted with a GP who refused to provide information on the final clinical outcome</li> </ul> |

**Figure 1. Flowchart of the Safety First study**Data analysis

(i) The diagnostic accuracy of the urgency allocation on two separate outcomes: ACS, or TIA/stroke, will be calculated in terms of sensitivity, specificity, positive and negative predictive values. In addition, we will perform sensitivity analyses; a) also considering other emergency cases with chest discomfort, e.g. pulmonary embolism, acute heart failure, and thoracic aortic dissection, or in the domain symptoms suggestive of TIA/stroke; b) other emergency cases with neurological symptoms, e.g. subarachnoidal haemorrhage (SAH), epilepsy.

1  
2  
3 (ii) Multivariable logistic regression analysis will be applied to identify history items or caller  
4 characteristics that independently predict either ACS or TIA/stroke. In addition, multivariable  
5 models will be developed that predict the presence of respectively ACS, or TIA/stroke, and the  
6 C-statistic with the 95% confidence interval will be calculated after bootstrapping to correct for  
7 over-optimism. (32) Before multivariable analysis, multiple imputation techniques will be  
8 applied for missing values. Variables with more than 50% missings will not be considered.  
9 Variable selection will be based on literature review (known diagnostic predictors in both  
10 domains) and on univariable analysis (inclusion of variables with  $p < 0.15$ ). Special attention will  
11 be paid to gender and age, either as interaction term or by calculating gender and/or age-  
12 specific prediction models. All data analyses will be performed using SPSS statistical software  
13 program version 25.0.  
14  
15  
16  
17  
18  
19  
20  
21  
22

#### 23 24 Blinding of researchers

25  
26  
27 All researchers listening to the recordings, and filling out the electronic case record forms or  
28 who are otherwise involved in the Safety First study, e.g. the expert panel of one of our  
29 additional studies, will be blinded to the callers' clinical outcomes.  
30  
31  
32  
33

#### 34 Power calculation

35  
36  
37 For the power calculation we used the recommendations that apply to diagnostic studies. (21)  
38 Records of 2014-2016 were used and after application of the exclusion criteria two random  
39 samples of 2,000 recordings with 'symptoms suggestive of ACS' and 1,000 recordings with  
40 'symptoms suggestive of TIA/stroke' will be drawn. A prior pilot study showed that 1 out of 9  
41 callers symptoms suggestive of ACS is, after diagnostic work-up, diagnosed with ACS and 1 out  
42 of 2 callers symptoms suggestive for TIA-stroke is diagnosed with TIA or stroke. Based on  
43 Harrell's rule of thumb, for ACS 2,000 audio-tapes allow for the analysis of 22 variables and for  
44 TIA-stroke 1,000 audio tapes allow for the analysis of 50 diagnostic items. We speculated that  
45 more variables would be needed to evaluate suspected TIA/stroke cases than patients in the  
46 domain 'suspicion of ACS' because the former patients may present themselves with a larger  
47 variety of symptoms. (33)  
48  
49  
50  
51  
52  
53  
54  
55  
56  
57  
58  
59  
60

## Additional studies

We explicitly chose to describe the observational cross-sectional study in more detail and not the other three studies because it is the largest study within the Safety First project, and for readability. As part of the Safety First project, three additional but smaller studies will be carried out to further expand the knowledge about the triage process at OHS-PC.

### (i) A case-control study on calamities

A calamity is defined as an adverse event with serious permanent patient harm or death as a consequence. (34) By Dutch law, root cause analysis (RCA) of every single calamity is required. RCA often points at flaws in the triage process as root causes for such calamities (35), resulting in an array of improvement measures for daily practice. However, it is unknown whether cases that result in a calamity really differ from those not evolving into a calamity, as all only have been evaluated as individual cases by experts knowing they evaluated a calamity and their assessment is thus prone to hindsight bias. (36, 37) In the OHS-PC setting calamities are very rare (0.006%) and the majority is of cardiovascular origin, e.g. missed acute myocardial infarction (AMI). (35) The aim of this additional study is to provide a more thorough view on missed or too late diagnosed AMIs that resulted in calamities by comparing these cases with matched controls in the domain of callers with chest pain, either due to ACS or not. The main question is whether the calamity cases actually differ from controls with respect to call and patient characteristics. For this additional study we will collect new data (calamity cases) and use data from the larger observational study described earlier for sampling our controls. Archived triage conversations from the period January 2013 – December 2017 of the calamity cases (defined as a missed diagnosis of AMI) will be compared with triage conversations of controls not meeting the calamity definition but also contacting the OHS-PC with symptoms suggestive of ACS. Per calamity case 8 controls will be matched to the case according to age, gender and symptom presentation. A researcher blinded to the outcome will extract information regarding call characteristics, caller and symptom characteristics (including medical history) and urgency allocation, by re-listening the archived triage calls and by using the

1  
2  
3 registered information. All data will be inserted in a database. An expert panel of experienced  
4 GPs blinded to the final outcome (calamity or no calamity), thus without case specific hindsight  
5 bias, will evaluate the quality and safety of triage conversations, and the diagnostic accuracy  
6 (sensitivity, specificity, predictive values) of safe triage handling according to the expert panel  
7 will be calculated against the final outcome (calamity or no calamity).  
8  
9  
10  
11

#### 12 13 (ii) Conversation analysis study

14  
15  
16 In this additional study we will assess how conversation aspects may affect the urgency  
17 allocation during telephone triage. The ways in which obligatory NTS questions and other  
18 questions are formulated by the triage nurse (i.e. suggestive questions), and responded to by  
19 the conversation partner may provide more thorough insight into question-answer sequences  
20 at the OHS-PC that can be helpful to improve the (use of) the NTS. We will transcribe a sample  
21 of the conversations from the case-control study following the Jefferson conventions. These  
22 transcripts that can be considered as new data will then be qualitatively analysed with  
23 established conversation analysis techniques. (38-40) We will specifically focus on either/or  
24 questions and their various formats (e.g. two-choice, multiple choice, open-ended or tag  
25 format) in the urgency decision phase of the triage calls.  
26  
27  
28  
29  
30  
31  
32  
33  
34  
35

#### 36 (iii) Interview study with triage nurses

37  
38  
39 Finally, we will perform a qualitative interview study of triage nurses with the aim to gain more  
40 knowledge on triage nurses' reasoning during telephone triage of callers with symptoms  
41 suggestive of ACS or TIA/stroke, and how they use the NTS for decision making in these two  
42 domains. We will conduct semi-structured audio-stimulated recall interviews. (41) Per interview  
43 one or two recordings from a recent shift at the OHS-PC will be used to stimulate triage nurses'  
44 reflections. The interviews will be transcribed and the transcripts will be qualitatively analysed  
45 according to the principles of the grounded theory approach. (42)  
46  
47  
48  
49  
50  
51  
52

#### 53 **Patient and public involvement**

1  
2  
3 Patients were not directly involved in the design of this study, but representatives participate in  
4 the stakeholders meetings every 6 months together with other representatives, i.e. of the local  
5 and national OHS-PC organization and the Dutch Health and Youth Care Inspectorate. They  
6 provide crucial input that helps us with formulating additional, clinically relevant research  
7 questions.  
8  
9  
10  
11  
12

### 13 **Ethics and dissemination**

14  
15  
16 The Medical Ethics Committee of the University Medical Centre Utrecht, the Netherlands  
17 endorsed this study (National Trial Register (NTR) identification number: NTR7331). All personal  
18 data, as well as all research data were stored anonymized according to the European General  
19 Data Protection Regulation. Data collection started in January 2016 and will last until December  
20 2020. Communications and publications on the results will not enable identification of  
21 individual callers. Results will be disseminated to relevant primary care communities in peer-  
22 reviewed journals, and at scientific conferences. In addition, this research project will also  
23 result in two PhD theses.  
24  
25  
26  
27  
28  
29  
30  
31  
32  
33  
34  
35  
36  
37  
38  
39  
40  
41  
42  
43  
44  
45  
46  
47  
48  
49  
50  
51  
52  
53  
54  
55  
56  
57  
58  
59  
60

## Discussion

The Safety First study will provide diagnostic accuracy data on ACS and TIA/stroke in the primary care setting. The efficiency and safety of the NTS in the out-of-hours primary care setting will be evaluated for callers with symptoms suggestive of ACS or TIA/stroke. In a case-control study we will explore calamities (missed acute myocardial infarctions) and assess whether they differ from controls (other patients with symptoms suggestive of ACS but not fulfilling the calamity criteria) with respect to call and patient characteristics. With qualitative studies we will generate more thorough knowledge on how triage nurses work and how the NTS is used.

### Efficiency and patient safety

A systematic review about patient safety in the OHS-PC setting concluded that 10% of all OHS-PC calls could be considered as 'unsafe'. (43) However, the claim of 'unsafe' calls was based on surrogate markers, and not on patients' clinical outcomes, and clearly contrasts with the very low incidence of calamities (0.006%). (35) By using the patients' final clinical outcomes as the reference, the Safety First study will address an important knowledge gap on diagnostic accuracy of telephone triage. In addition, our study will provide a more complete view on the patient safety of the NTS than can be achieved with root cause analysis of individual cases only, often resulting in the conclusion that the urgency level is underestimated. (35, 44) It is difficult to define when telephone triage at the OHS-PC is safe. Our case-control study will provide deeper knowledge on telephone conversations that resulted in calamities and their matched controls. This knowledge might put the general view on (i) analysing calamities, and (ii) the weight that is assigned to improvement measures in a different perspective.

### Users of the NTS

A questionnaire among Dutch GPs working at the OHS-PCs reported that a majority of GPs (83.9%) believe that nowadays telephone triage contributes to overconsumption of care at

1  
2  
3 OHS-PC. About 85% of responders consider this to be at least partly attributable to the level of  
4 experience and education, and the attitude and personality of the triage nurses. (13) As the  
5 performance of the NTS is inextricably linked to its users, we want to include conversation  
6 analysis and interview studies with triage nurses. The quality of telephone triage is highly  
7 dependent on the quality of communication between the triage nurse and the caller, and  
8 therefore the communication skills of triage nurses. (27, 45) Moreover, they have to deal with  
9 callers who greatly vary in their ability to communicate effectively and coherently. (46, 47)  
10 Additionally, the telephone triage is necessarily only based on oral information provided by the  
11 caller, lacking any visual cues or diagnostic information from physical examination. Our  
12 additional study on conversation analysis will add knowledge on the ways in which questions  
13 and answers are formulated by triage nurses and callers, and how this affects the triage  
14 conversation.

15  
16 Secondly, we will also focus on the obligatory question structure within the NTS, and how this  
17 affects the users. The NTS is a semi-automatic support system that is heavily dependent on the  
18 input of the triage nurses themselves; which 'main presenting problem' he/she chooses is  
19 based on the initial information from the caller, and each of the in total 57 'presenting  
20 problems' are linked to a separate algorithm of hierarchically organized, pre-specified  
21 questions. These questions need to be filled out before the NTS generates an urgency  
22 allocation. (48) Previous studies suggested that triage nurses may experience interactional  
23 dilemmas while working with a computer decision support. (49) Our interview study will  
24 provide more insight into triage nurses' clinical reasoning process during telephone triage, and  
25 how they use the NTS for decision making within the domains of callers with symptoms  
26 suggestive of ACS or TIA/stroke. This information can help improve the workability of NTS in  
27 daily practice. Furthermore, in these domains the knowledge that 'time is muscle' or 'time is  
28 brain' puts extra strain on the triage nurse, because unnecessary delays directly affect  
29 morbidity and mortality of patients who actually show to have ACS or TIA/stroke. (22, 23)  
30 Beside this stress factor, other factors such as shiftwork, fatigue, multitasking and understaffing  
31 can attribute to the risk of errors during the triage process. (27) In our interview study we want  
32  
33  
34  
35  
36  
37  
38  
39  
40  
41  
42  
43  
44  
45  
46  
47  
48  
49  
50  
51  
52  
53  
54  
55  
56  
57  
58  
59  
60

1  
2  
3 to include these risk factors, and their possible influence on the reasoning process of triage  
4  
5 nurses.  
6  
7

## 8 **Conclusion**

9

10  
11 Our Safety First study will provide diagnostic accuracy data on ACS and TIA/stroke, and new  
12  
13 insights on efficiency, patient safety and the use of the NTS by triage nurses during telephone  
14  
15 triage of callers with symptoms suggestive of ACS or TIA/stroke at the OHS-PC. Results from our  
16  
17 study will help to improve the telephone triage in these important domains and improve both  
18  
19 efficiency and safety for callers.  
20  
21  
22  
23  
24  
25  
26  
27  
28  
29  
30  
31  
32  
33  
34  
35  
36  
37  
38  
39  
40  
41  
42  
43  
44  
45  
46  
47  
48  
49  
50  
51  
52  
53  
54  
55  
56  
57  
58  
59  
60



## List of abbreviations

ACS: Acute Coronary Syndrome; AMI: Acute Myocardial Infarction; ED: Emergency Department; TIA: Transient Ischemic Attack; GP: General Practitioner; NTS: Netherlands Triage Standard, OHS-PC: Out-Of-Hours Services in Primary Care.

## Author contributions

DLZ and FHR conceived the idea for the study and gained funding. DLZ, FHR, RAD, EDG and AWH designed the study. LTW and DCE prepared the manuscript and wrote the first draft, supervised by FHR. DLZ, FHR, RAD, EDG and AWH provided intellectual input and critically reviewed the manuscript. All authors read and approved the final manuscript.

## Funding statement

This work was supported by the department of general practice of the University Medical Centre Utrecht, Associate Professorship-promotion grant of D.L. Zwart, MD, PhD, the foundation 'Netherlands Triage Standard' and the foundation 'Stoffels-Hornstra'. The views expressed are those of the authors and not necessarily those of the foundations. This research was conducted without direct involvement from both funding foundations.

## Competing interests statement

The authors declare that they have no competing interests.

## Acknowledgements

The authors thank the OHS-PC foundation 'Primair Huisartsenposten' and all employees of the participating locations for their cooperation in this study, notably for providing data and technical support.

**Word count manuscript: 4457**

## References

1. Kuriyama A, Urushidani S, Nakayama T. Five-level emergency triage systems: variation in assessment of validity. *Emergency medicine journal : EMJ*. 2017;34(11):703-10.
2. Netherlands Triage Standard [cited 2018 June 22]. Available from: <http://de-nts.nl/>.
3. National guidelines for telephone triage and advice in Family Practice [cited 2018 June 22]. Available from: <https://www.nhg.org/winkel/producten/nhg-triagewijzer-versie-2016>.
4. Smits M, Rutten M, Keizer E, Wensing M, Westert G, Giesen P. The Development and Performance of After-Hours Primary Care in the Netherlands: A Narrative Review. *Annals of internal medicine*. 2017;166(10):737-42.
5. van Ierland Y, van Veen M, Huibers L, Giesen P, Moll HA. Validity of telephone and physical triage in emergency care: the Netherlands Triage System. *Family practice*. 2011;28(3):334-41.
6. Nishi F, de Oliveira Motta Maia F, de Souza Santos I, de Almeida Lopes Monteiro da Cruz D. Assessing sensitivity and specificity of the Manchester Triage System in the evaluation of acute coronary syndrome in adult patients in emergency care: a systematic review. *JBIC Database of Systematic Reviews and Implementation Reports*. 2017;15(6):1747-61.
7. Steiner D, Renetseder F, Kutz A, Haubitz S, Faessler L, Anderson JB, et al. Performance of the Manchester Triage System in Adult Medical Emergency Patients: A Prospective Cohort Study. *J Emerg Med*. 2016;50(4):678-89.
8. Grouse AI, Bishop RO, Bannon AM. The Manchester Triage System provides good reliability in an Australian emergency department. *Emergency medicine journal : EMJ*. 2009;26(7):484-6.
9. Jimenez JG, Murray MJ, Beveridge R, Pons JP, Cortes EA, Garrigos JB, et al. Implementation of the Canadian Emergency Department Triage and Acuity Scale (CTAS) in the Principality of Andorra: Can triage parameters serve as emergency department quality indicators? *CJEM*. 2003;5(5):315-22.
10. Lake R, Georgiou A, Li J, Li L, Byrne M, Robinson M, et al. The quality, safety and governance of telephone triage and advice services - an overview of evidence from systematic reviews. *BMC health services research*. 2017;17(1):614.
11. Blank L, Coster J, O'Cathain A, Knowles E, Tosh J, Turner J, et al. The appropriateness of, and compliance with, telephone triage decisions: a systematic review and narrative synthesis. *J Adv Nurs*. 2012;68(12):2610-21.
12. Jansen T, de Hoon S, Hek K, Verheij R. Developments at the out-of-hours services in primary care. Changes in care demand and health care issues in 2013-2015. [Ontwikkelingen op de huisartsenpost. Veranderingen in zorgvraag en gezondheidsproblemen in 2013-2015.]. NIVEL, 2017.
13. Keizer E, Maassen I, Smits M, Wensing M, Giesen P. Reducing the use of out-of-hours primary care services: A survey among Dutch general practitioners. *The European journal of general practice*. 2016;22(3):189-95.
14. O'Cathain A, Munro J, Armstrong I, O'Donnell C, Heaney D. The effect of attitude to risk on decisions made by nurses using computerised decision support software in telephone clinical assessment: an observational study. *BMC Med Inform Decis Mak*. 2007;7:39.
15. O'Cathain A, Nicholl J, Sampson F, Walters S, McDonnell A, Munro J. Do different types of nurses give different triage decisions in NHS Direct? A mixed methods study. *J Health Serv Res Policy*. 2004;9(4):226-33.
16. Dutch Health and Youth Care Inspectorate, IGJ. Learning from incident reports in openness. Learn and improve, working together on further improvement of quality of care. [In openheid leren van meldingen. Leren en verbeteren, samen werken aan verdere verbetering van kwaliteit van zorg.]. Dutch Ministry of Health, Welfare and Sport; 2016.
17. Smits M, Verheij R. Changes in urgency of contacts with the out-of-hours services in primary care 2013-2016. [Veranderingen in de urgentie van contacten met de huisartsenpost 2013-2016.]. NIVEL, 2017.

18. Plat FM, Peters YAS, Loots FJ, de Groot CJA, Eckhardt T, Keizer E, et al. Ambulance dispatch versus general practitioner home visit for highly urgent out-of-hours primary care. *Family practice*. 2017(Dec 20).
19. Hoerweg BB, Willemsen RT, Cleef LE, Boogaerts T, Buntinx F, Glatz JF, et al. Frequency of chest pain in primary care, diagnostic tests performed and final diagnoses. *Heart*. 2017;103(21):1727-32.
20. Wibring K, Herlitz J, Christensson L, Lingman M, Bang A. Prehospital factors associated with an acute life-threatening condition in non-traumatic chest pain patients - A systematic review. *International journal of cardiology*. 2016;219:373-9.
21. Rawshani A, Larsson A, Gelang C, Lindqvist J, Gellerstedt M, Bang A, et al. Characteristics and outcome among patients who dial for the EMS due to chest pain. *International journal of cardiology*. 2014;176(3):859-65.
22. Bosner S, Haasenritter J, Becker A, Karatolios K, Vaucher P, Gencer B, et al. Ruling out coronary artery disease in primary care: development and validation of a simple prediction rule. *CMAJ : Canadian Medical Association journal = journal de l'Association medicale canadienne*. 2010;182(12):1295-300.
23. Berglund A, von Euler M, Schenck-Gustafsson K, Castren M, Bohm K. Identification of stroke during the emergency call: a descriptive study of callers' presentation of stroke. *BMJ open*. 2015;5(4):e007661.
24. Leathley MJ, Jones SP, Gibson JM, Ford GA, McAdam JJ, Quinn T, et al. "Can you send an ambulance please?": a comparison of callers' requests for emergency medical dispatch in non-stroke and stroke calls. *Emergency medicine journal : EMJ*. 2014;31(e1):e25-8.
25. Coster JE, Turner JK, Bradbury D, Cantrell A. Why Do People Choose Emergency and Urgent Care Services? A Rapid Review Utilizing a Systematic Literature Search and Narrative Synthesis. *Acad Emerg Med*. 2017;24(9):1137-49.
26. Ernesater A, Winblad U, Engstrom M, Holmstrom IK. Malpractice claims regarding calls to Swedish telephone advice nursing: what went wrong and why? *J Telemed Telecare*. 2012;18(7):379-83.
27. Roing M, Holmstrom IK. Malpractice claims in Swedish telenursing: lessons learned from interviews with telenurses and managers. *Nurs Res*. 2015;64(1):35-43.
28. Katz HP, Kaltsounis D, Halloran L, Mondor M. Patient safety and telephone medicine : some lessons from closed claim case review. *J Gen Intern Med*. 2008;23(5):517-22.
29. The Dutch College of General Practitioners, NHG. The International Classification of Primary Care (ICPC). Version 6 (Dutch translation derived from ICPC-1 by the WONCA International Classification Committee). 2018. Available from: <https://www.nhg.org/themas/artikelen/icpc>.
30. Zwaanswijk M, Hek K. ICPC coding at the out-of-hours service in primary care [ICPC-codering op de huisartsenpost]. *Huisarts Wet*. 2013;56(11).
31. Rosendal M, Carlsen A, Rask M, Moth G. Symptoms as the main problem in primary care: A cross-sectional study of frequency and characteristics. *Scandinavian journal of primary health care*. 2015;33(2):91-9.
32. Efron BT, R. An introduction to the bootstrap. *Monographs on statistics and applied probability*. New York: Chapman & Hall; 1993.
33. Harrell FE, Jr., Lee KL, Califf RM, Pryor DB, Rosati RA. Regression modelling strategies for improved prognostic prediction. *Stat Med*. 1984;3(2):143-52.
34. Healthcare Quality, Complaints and Disputes Act (WKKGZ), (2016).
35. Rutten MH, Kant J, Giesen P. What can we learn from calamities at out-of-hours services in primary care? [Wat kunnen we leren van calamiteiten op de huisartsenpost?]. *Huisarts Wet*. 2018;6(61).
36. Henriksen K, Kaplan H. Hindsight bias, outcome knowledge and adaptive learning. *Qual Saf Health Care*. 2003;12 Suppl 2:ii46-50.
37. Zwaan L, Monteiro S, Sherbino J, Ilgen J, Howey B, Norman G. Is bias in the eye of the beholder? A vignette study to assess recognition of cognitive biases in clinical case workups. *BMJ Qual Saf*. 2017;26(2):104-10.

- 1  
2  
3 38. Jefferson G. A technique for inviting laughter and its subsequent acceptance/declination. . In:  
4 Psathas G, editor. *Everyday language: Studies in ethnomethodology*. New York, London: Irvington;  
5 1979. p. 79-96.
- 6 39. Jefferson G. On a failed hypothesis: conjunctionals as overlap-vulnerable. In: Brabant KU, editor.  
7 *Tilburg papers in language and literature*. Tilburg1983. p. 1-33.
- 8 40. Jefferson G. Notes on a possible metric which provides for a 'standard maximum' silence of  
9 approximately one second in conversation. In: Brabant KU, editor. *Tilburg papers in language and*  
10 *literature*. Tilburg1983. p. 1-83.
- 11 41. Dempsey N. Stimulated recall interviews in ethnography. *Qualitative sociology*. 2010;33(3):349-  
12 67.
- 13 42. Kolb SM. Grounded theory and the constant comparative method: valid research strategies for  
14 educators. *Journal of Emerging Trends in Educational Research and Policy Studies*. 2012;3:83-6.
- 15 43. Huibers L, Smits M, Renaud V, Giesen P, Wensing M. Safety of telephone triage in out-of-hours  
16 care: a systematic review. *Scandinavian journal of primary health care*. 2011;29(4):198-209.
- 17 44. Annual reports of 2014 and 2015. [Jaarverslagen 2014 en 2015.]. Utrecht, The Netherlands:  
18 Foundation Primair out-of-hours services in primary care [Stichting Primair Huisartsenposten]
- 19 45. Holmstrom I. Decision aid software programs in telenursing: not used as intended? Experiences  
20 of Swedish telenurses. *Nurs Health Sci*. 2007;9(1):23-8.
- 21 46. Pettinari CJ, Jessopp L. "Your ears become your eyes": managing the absence of visibility in  
22 NHS Direct. *J Adv Nurs*. 2001;36(5):668-75.
- 23 47. Roing M, Rosenqvist U, Holmstrom IK. Threats to patient safety in telenursing as revealed in  
24 Swedish telenurses' reflections on their dialogues. *Scand J Caring Sci*. 2013;27(4):969-76.
- 25 48. Smits M, Keizer E, Ram P, Giesen P. Development and testing of the KERNset: an instrument to  
26 assess the quality of telephone triage in out-of-hours primary care services. *BMC health services research*.  
27 2017;17(1):798.
- 28 49. Murdoch J, Barnes R, Pooler J, Lattimer V, Fletcher E, Campbell JL. The impact of using  
29 computer decision-support software in primary care nurse-led telephone triage: interactional dilemmas  
30 and conversational consequences. *Soc Sci Med*. 2015;126:36-47.
- 31  
32  
33  
34  
35  
36  
37  
38  
39  
40  
41  
42  
43  
44  
45  
46  
47  
48  
49  
50  
51  
52  
53  
54  
55  
56  
57  
58  
59  
60

9 OHS-PC in the vicinity of Utrecht  
1,2 million telephone conversations in the period 2014 to 2016

1  
2  
3

**1. Preselection of tapes ACS**

**Inclusion:**  
 8 Callmanager database  
 9 selection based on ICPC  
 10 codes: K01, K02, K03, K24,  
 11 K74, K75, K76, K77, K93, L04,  
 12 P74, R02, R98  
 13 Keyword selection: thoracic  
 14 pain, chest pain, myocardial  
 15 infarction, heart attack and  
 16 their common abbreviations  
 17

**Reasons for exclusion:**  
 19 Callers younger than 18 years  
 20 Callers not living in the  
 21 catchment area of the OHS-  
 22 PC  
 23 Callers enlisted with a GP  
 24 who refused to provide  
 25 information on the final  
 26 clinical outcome

**2. Selection after listening back to tapes**

**Reasons for exclusion:**  
 32 No triage conversation, but  
 33 consultation, e.g. between  
 34 colleagues or questions  
 35 about medication use  
 36 Poor quality recordings

37  
38  
39  
40  
41  
42  
43  
44  
45  
46  
47  
48  
49  
50  
51  
52  
53  
54  
55  
56

**1. Preselection of tapes TIA/stroke**

**Inclusion:**  
 • Callmanager database  
 selection based on ICPC codes:  
 K89, K90, N17, N18, N19, N29,  
 N89, N91  
 • Keyword selection: TIA, stroke,  
 cerebral or brain bleeding or  
 haemorrhage or infarction,  
 neurological deficit, arm or leg  
 weakness, face or mouth  
 drooping, speech or visual  
 problems or sensory  
 disturbances

**Reasons for exclusion:**  
 - Callers younger than 18 years  
 - Callers not living in the  
 catchment area of the OHS-PC  
 - Callers enlisted with a GP who  
 refused to provide information  
 on the final clinical outcome

**2. Selection after listening back to tapes**

**Reasons for exclusion:**  
 - No triage conversation, but  
 consultation, e.g. between  
 colleagues or questions  
 about medication use  
 - Poor quality recordings

Available tapes ACS  
n=270,000

Available tapes TIA/stroke  
n=13,500

Random sample ACS  
n=2,000

Random sample TIA/stroke  
n=1,000

General practitioners will be contacted for follow-up  
 • Letter emergency department  
 • Letter OHS-PC  
 • Medical record own GP
